# Supplementary material for: Ligand influence in electrocatalytic properties of Cu(ii) triazole complexes for hydrogen peroxide detection in aqueous media
Source: Royal Society of Chemistry journal article supplement (doi:10.1039/d2dt03549a), 2023-01-01
Supplement: d2dt03549a1.pdf [file d2dt03549a1.pdf]

## Electronic Supplementary Information

### Ligand influence in electrocatalytic properties of Cu(II) triazole complexes for hydrogen peroxide detection in aqueous media

Paula Cortés,<sup>a</sup> Mariña Castroagudín,<sup>a</sup> Víctor Kesternich,<sup>a</sup> Marcia Pérez-Fehrmann,<sup>a</sup> Erico Carmona,<sup>b</sup> Guillermo Zaragoza,<sup>c</sup> Arnoldo Vizcarra,<sup>d</sup> Lucas Patricio Hernández-Saravia\*<sup>d</sup> and Ronald Nelson\*<sup>a</sup>

<sup>a</sup> Departamento de Química, Facultad de Ciencias, Universidad Católica del Norte, Avda. Angamos 0610, Antofagasta 1270709, Chile.

<sup>b</sup> Facultad de Recursos Naturales, Universidad Arturo Prat, Iquique, Chile.

<sup>c</sup> Unidade de Difracción de Raios X, RIAIDT, Universidade de Santiago de Compostela, Campus VIDA, Santiago de Compostela 15782, Spain

<sup>d</sup> Instituto de Alta Investigación, Universidad de Tarapacá, Arica, Chile

Email: rnelson@ucn.cl & electrochem.hernandezsaravia@gmail.com

### Contents

|                                                                                                                                                           |    |
|-----------------------------------------------------------------------------------------------------------------------------------------------------------|----|
| 1. Synthesis of copper (II) complexes Cu(L <sup>NO2</sup> ) <sub>2</sub> , Cu(L <sup>Br</sup> ) <sub>2</sub> and Cu(L <sup>OMe</sup> ) <sub>2</sub> ..... | 2  |
| 2. Crystallography data of Cu(L <sup>NO2</sup> ) <sub>2</sub> , Cu(L <sup>Br</sup> ) <sub>2</sub> and Cu(L <sup>OMe</sup> ) <sub>2</sub> complexes.....   | 10 |
| 3. Electronic absorption spectra (UV-Vis) .....                                                                                                           | 16 |
| 4. Cyclic voltammogram characterization.....                                                                                                              | 21 |
| 5. SEM.....                                                                                                                                               | 23 |
| 6. IR and NMR Spectra .....                                                                                                                               | 24 |

## 1. Synthesis of copper (II) complexes $\text{Cu}(\text{L}^{\text{NO}_2})_2$ , $\text{Cu}(\text{L}^{\text{Br}})_2$ and $\text{Cu}(\text{L}^{\text{OMe}})_2$

### 1.1. Synthesis of Ethyl 1-Aryl-5-methyl-1H-1,2,3-triazole-4-carboxylate **S2a-c**.

Exemplified for **S2a**.

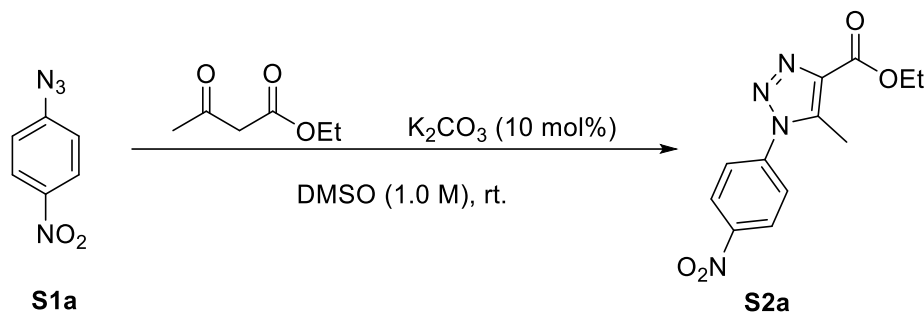

Catalytic  $\text{K}_2\text{CO}_3$  (252 mg, 1.82 mmol, 10 mol%) were added to a solution of phenylazide **S1a** (3.01 g, 18.32 mmol, 1.0 equiv.) and ethyl acetoacetate (2.54 mL, 20.11 mmol, 1.1 equiv) in DMSO (18.3 mL, 1.0 M). The resulting reaction mixture was stirred at room temperature for 3 h. The progress of the reaction was monitored by TLC. Then, cold water (30 mL) was added, obtaining a precipitate that was filtered and washed successively with cold water and vacuum drying. Triazole **S2a** was purified by crystallization with EtOH and then with AcOEt, obtaining 4.63 g as yellow crystals (92% yield). **m.p.**: 178–180°C; **IR** ( $\text{cm}^{-1}$ )  $\nu$ : 3120, 3099, 3080 ( $\text{C}_{\text{ar}}\text{-H}$ ), 2977, 2937, 2870 ( $\text{C}_{\text{sp}^3}\text{-H}$ ), 1721 ( $\text{C}=\text{O}$ ), 1597 ( $\text{C}_{\text{ar}}\text{-C}_{\text{ar}}$ ), 1566 ( $\text{N}=\text{N}$ ), 1533, 1346 ( $\text{Ar-NO}_2$ ), 1249 ( $\text{CO-O}$ ), 980 ( $\text{N-N=N}$ );  **$^1\text{H NMR}$**  (500 MHz,  $\text{CDCl}_3$ )  $\delta$  (ppm): 8.44 (d,  $J = 8.9$  Hz, 1H), 7.73 (d,  $J = 9.0$  Hz, 1H), 4.45 (q,  $J = 7.1$  Hz, 1H), 2.67 (s, 1H), 1.43 (t,  $J = 7.1$  Hz, 1H);  **$^{13}\text{C NMR}$**  (126 MHz,  $\text{CDCl}_3$ )  $\delta$  (ppm): 161.4 ( $\text{C}=\text{O}$ ), 148.3 (C), 140.3 (C), 138.9 (C), 137.5 (C), 126.0 (CH), 125.3 (CH), 61.5 ( $\text{CH}_2$ ), 14.4 ( $\text{CH}_3$ ), 10.3 ( $\text{CH}_3$ ). **HRESIMS**: Calculated to  $\text{C}_{12}\text{H}_{13}\text{N}_4\text{O}_4$  [ $\text{M}+\text{H}$ ] $^+$ :  $m/z$  277.0937, found: 277.0909. (Figure S16-18).

For the synthesis of triazoles **S2b** and **S2c**, the same procedure described for **S2a** was used, obtaining:

*Ethyl 1-(4-bromophenyl)-5-methyl-1H-1,2,3-triazole-4-carboxylate (S2b):*

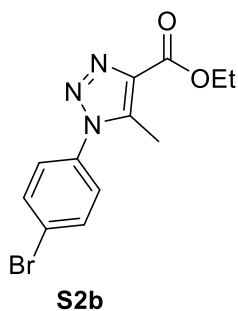

White crystals in THF (92% yield from 4-bromophenylazide **S1b**); **m.p.:** 176–178°C; **IR** (cm<sup>-1</sup>)  $\nu$ : 3099, 3067 (C<sub>Ar</sub>-H), 1717 (C=O), 1562 (N=N), 1248 (CO-O), 981 (N-N=N), 840 (Ar-Br); **<sup>1</sup>H NMR** (500 MHz, CDCl<sub>3</sub>)  $\delta$  (ppm): 7.67 (d,  $J$  = 7.5 Hz, 2H), 7.32 (d,  $J$  = 7.8 Hz, 2H), 4.41 (q,  $J$  = 6.7 Hz, 2H), 2.55 (s, 3H), 1.39 (t,  $J$  = 6.8 Hz, 3H); **<sup>13</sup>C NMR** (126 MHz, CDCl<sub>3</sub>)  $\delta$  (ppm): 161.5 (C=O), 138.8 (C), 136.9 (C), 134.4 (C), 133.0 (CH), 126.9 (CH), 124.2 (C), 61.2 (CH<sub>2</sub>), 14.4 (CH<sub>3</sub>), 10.1 (CH<sub>3</sub>); **HRESIMS**: Calculated to C<sub>12</sub>H<sub>13</sub>BrN<sub>3</sub>O<sub>2</sub> [M+H]<sup>+</sup>:  $m/z$  310.0191, found: 310.0159. (Figure S19-21)

*Ethyl 1-(4-methoxyphenyl)-5-methyl-1H-1,2,3-triazole-4-carboxylate (S2c):*

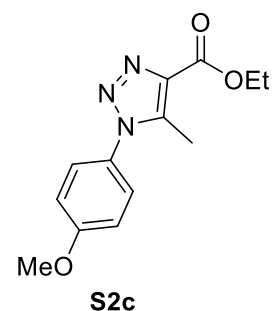

White crystals in THF (82% yield from 4-methoxyphenylazide **S1c**); **m.p.:** 140–142°C; **IR** (cm<sup>-1</sup>)  $\nu$ : 3086, 3004 (C<sub>Ar</sub>-H), 1709 (C=O), 1564 (N=N), 1247 (CO-O), 982 (N-N=N); **<sup>1</sup>H-NMR** (500 MHz, CDCl<sub>3</sub>)  $\delta$  (ppm): 7.32 (d,  $J$  = 5.4 Hz, 2H), 7.02 (d,  $J$  = 5.1 Hz, 2H), 4.43 (q,  $J$  = 6.2 Hz, 2H), 3.85 (s, 3H), 2.52 (s, 3H), 1.41 (t,  $J$  = 6.1 Hz, 3H); **<sup>13</sup>C NMR** (126 MHz, CDCl<sub>3</sub>)  $\delta$  (ppm): 161.8 (C=O), 160.7 (C), 139.1 (C), 136.5 (C), 128.2 (C), 126.9 (CH), 114.8 (CH), 61.1 (CH<sub>2</sub>), 55.8 (CH<sub>3</sub>), 14.5 (CH<sub>3</sub>), 10.1 (CH<sub>3</sub>); **HRESIMS**: Calculated to C<sub>13</sub>H<sub>16</sub>N<sub>3</sub>O<sub>3</sub> [M+H]<sup>+</sup>:  $m/z$  262.1192, found: 262.1152. (Figure S22-24)

1.2. Synthesis of bidentate triazole ligands **1a-b**. Exemplified for **1a**.

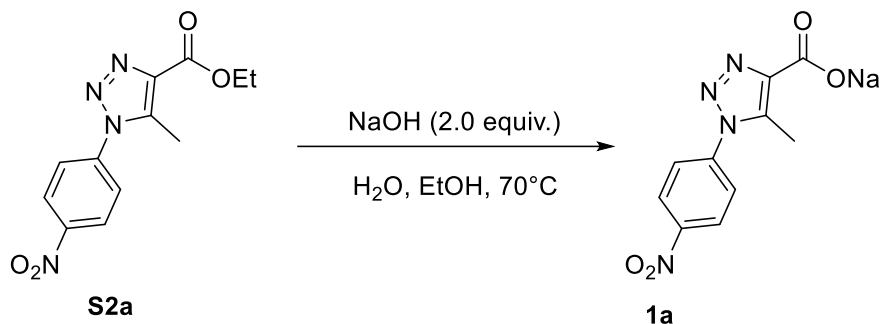

NaOH (579 mg, 14.48 mmol, 2.0 equiv.) and H<sub>2</sub>O (7.0 mL) was added to a solution of ethyl 5-methyl-1-(4-nitrophenyl)-1*H*-1,2,3-triazole-4-carboxylate (**S2a**) (2.0 g, 7.24 mmol) in EtOH (50 mL) at rt. The resulting mixture was warmed to 70 °C for 3 h and then cooled to room temperature. The resulting precipitate was filtered (washed with cold EtOH) and dried in vacuo to give sodium 5-methyl-1-(4-nitrophenyl)-1*H*-1,2,3-triazole-4-carboxylate **1a** as a white solid (1.92 g, 98% yield). **m.p.:** >300 °C; **IR** (KBr, cm<sup>-1</sup>) 3506 (O-H, residual moisture), 3114 and 3080 (C<sub>Ar</sub>-H), 1623 (C=O), 1601 (N=N), 1444 and 1346 (Ar-NO<sub>2</sub>), 1095 (CO-O). **<sup>1</sup>H-NMR** (400 MHz, DMSO-*d*<sub>6</sub> + CDCl<sub>3</sub>) δ (ppm): 8.41 (d, *J* = 8.9 Hz, 2H), 7.85 (d, *J* = 8.9 Hz, 2H), 2.55 (s, 3H).; **HRESIMS:** Calculated to C<sub>10</sub>H<sub>7</sub>N<sub>4</sub>O<sub>4</sub> [M-H]<sup>-</sup>: *m/z* 247.0473, found: 247.0465. (Figure S25-26)

For the synthesis of **1b**, the same procedure described for **1a** was used, obtaining:

Sodium 5-methyl-1-(4-nitrophenyl)-1H-1,2,3-triazole-4-carboxylate (**1b**):

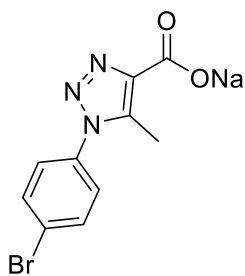

**1b**

White solid (77% yield from **S2b**). **m.p.:** 176-178 °C; **IR** (KBr,  $\text{cm}^{-1}$ ) 3510 (O-H, residual moisture), 3095 ( $\text{C}_{\text{Ar}}\text{-H}$ ), 1615 (C=O), 1496 (N=N), 1066 (CO-O), 840 (Ar-Br).  **$^1\text{H-NMR}$**  (400 MHz,  $\text{DMSO-}d_6$ )  $\delta$  (ppm): 7.69 (d,  $J = 8.6$  Hz, 2H), 7.36 (d,  $J = 8.7$  Hz, 2H), 2.36 (s, 3H);  **$^{13}\text{C}$**  **NMR** (101 MHz,  $\text{DMSO-}d_6$ )  $\delta$  (ppm): 168.24 (CO), 143.72 (C), 137.95 (C), 135.88 (C), 134.28 (CH), 128.59 (CH), 124.85 (C), 10.80 ( $\text{CH}_3$ ); **HRESIMS:** Calculated to  $\text{C}_{10}\text{H}_7\text{BrN}_3\text{O}_2$  [ $\text{M-H}$ ] $^-$ :  $m/z$  279.9727, found: 279.9734. (Figure S27-29)

### 1.3.Synthesis of bidentate triazole ligands **1c**.

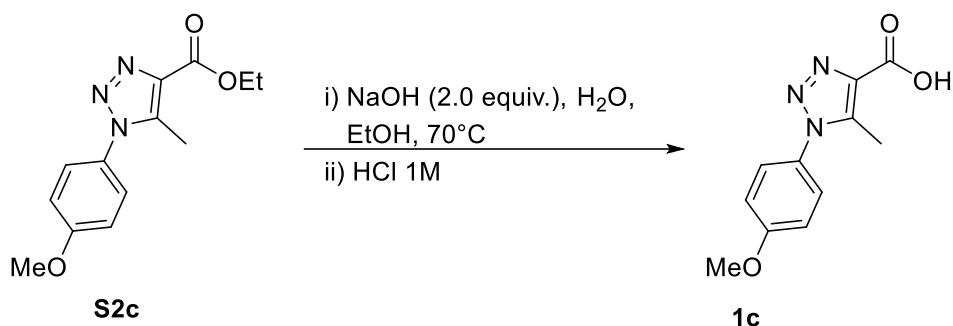

NaOH (612.32 mg, 15.31 mmol, 2.0 equiv.) and  $\text{H}_2\text{O}$  (7.6 mL) was added to a solution of ethyl 1-(4-methoxyphenyl)-5-methyl-1H-1,2,3-triazole-4-carboxylate (**S2c**) (2.0 g, 7.65 mmol) in EtOH (50 mL) at rt. The resulting mixture was warmed to 70 °C for 3 h and then cooled to room temperature. Then, the volatile fraction (EtOH) was evaporated in vacuo and water (50 mL) was added. The resulting mixture was acidified with 1M HCl to pH 3 and extracted with  $\text{CHCl}_3$  (3 x 20 mL). The combined organic layers were dried over  $\text{Na}_2\text{SO}_4$ , filtered and concentrated in vacuo to give 1-(4-methoxyphenyl)-5-methyl-1H-1,2,3-triazole-4-carboxylic acid **1c** (1.67 g, 93%) as a white solid which was used without purification in the next step. **m.p.:** 193 - 194 °C; **IR** (KBr,  $\text{cm}^{-1}$ )  $\nu$ : 3077 (COO-H), 3050 ( $\text{C}_{\text{Ar}}\text{-H}$ ), 1687

(C=O), 1518 (N=N), 1272 (CO-O). **<sup>1</sup>H-NMR** (400 MHz, DMSO-*d*<sub>6</sub>)  $\delta$  (ppm): 13.11 (s, 1H), 7.53 (d, *J* = 8.9 Hz, 2H), 7.15 (d, *J* = 8.9 Hz, 2H), 3.84 (s, 3H), 2.45 (s, 3H).; (101 MHz, DMSO-*d*<sub>6</sub>)  $\delta$  (ppm): 162.70 (CO), 160.21 (C), 139.09 (C), 136.32 (C), 128.14 (C), 127.01 (CH), 114.77 (CH), 55.64 (CH<sub>3</sub>), 9.69 (CH<sub>3</sub>).; **HRESIMS**: Calculated to C<sub>11</sub>H<sub>10</sub>N<sub>3</sub>O<sub>3</sub> [M-H]<sup>-</sup>: *m/z* 232.0728, found: 232.0733. (Figure S30-32)

#### 1.4. Synthesis of copper (II) complex $\text{Cu}(\text{L}^{\text{NO}_2})_2$

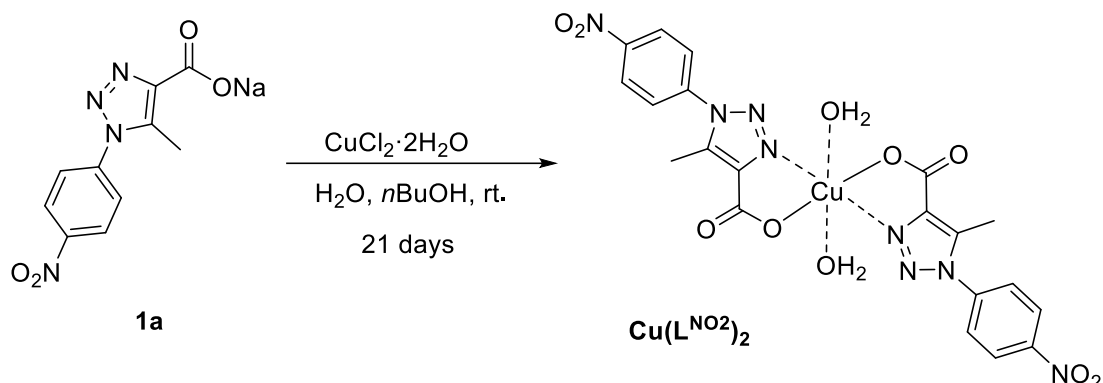

A solution of  $\text{CuCl}_2 \cdot 2\text{H}_2\text{O}$  (6.31 mg, 37.01  $\mu\text{mol}$ ) in *n*BuOH (4 mL) was carefully added to a solution of sodium 1-(4-nitrophenyl)-5-methyl-1*H*-1,2,3-triazole-4-carboxylate (**1a**) (20.0 mg, 74.02  $\mu\text{mol}$ ) in water (4 mL) contained in a vial. The vial was sealed, and a light blue precipitate was obtained after 21 days. The precipitate was crystallized from DMF obtaining light blue single crystals of  $\text{Cu}(\text{L}^{\text{NO}_2})_2$  after 4 days (9.30 mg, 42%). **m.p.:** 235-237 °C (dec.). **IR** (KBr,  $\text{cm}^{-1}$ )  $\nu$ : 3409 (O-H), 3118 and 3069 ( $\text{C}_{\text{Ar-H}}$ ), 1653 (C=O), 1530 (N=N), 1525 and 1350 (Ar- $\text{NO}_2$ ), 1317 (CO-O) (Figure S33). UV/Vis (DMF):  $\lambda_{\text{max}} = 276$  nm (Figure S4).  $\text{Cu}(\text{L}^{\text{NO}_2})_2$  structure was confirmed by X-ray crystallography (CCDC 2171639).

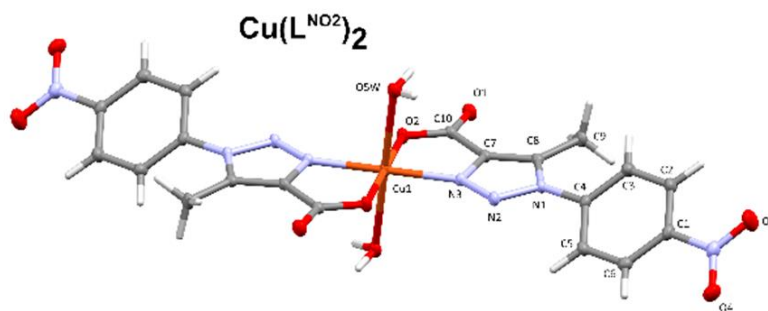

CCDC 2171639

### 1.5. Synthesis of copper (II) complex $\text{Cu}(\text{L}^{\text{Br}})_2$

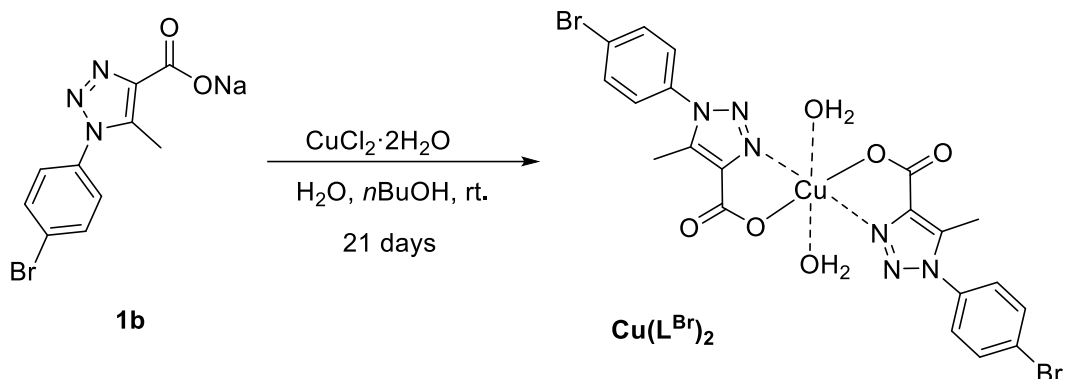

A solution of  $\text{CuCl}_2 \cdot 2\text{H}_2\text{O}$  (5.61 mg, 32.89  $\mu\text{mol}$ ) in  $n\text{BuOH}$  (4 mL) was carefully added to a solution of sodium 1-(4-bromophenyl)-5-methyl-1H-1,2,3-triazole-4-carboxylate (**1b**) (20.0 mg, 65.77  $\mu\text{mol}$ ) in water (4 mL) contained in a vial. The vial was sealed, and light blue single crystals of  $\text{Cu}(\text{L}^{\text{Br}})_2$  were obtained after 21 days (12.37 mg, 57%). **m.p.:** 222-225  $^\circ\text{C}$  (dec.). **IR** (KBr,  $\text{cm}^{-1}$ )  $\nu$ : 3226 (O-H), 3106 and 3054 ( $\text{C}_{\text{Ar-H}}$ ), 1657 (C=O), 1582 (N=N), 1313 (CO-O), 1010 (N-N=N), 850 (Ar-Br) (Figure S34). UV/Vis (DMF):  $\lambda_{\text{max}} = 267 \text{ nm}$  (Figure S5).  $\text{Cu}(\text{L}^{\text{Br}})_2$  structure was confirmed by X-ray crystallography (CCDC 2171641).

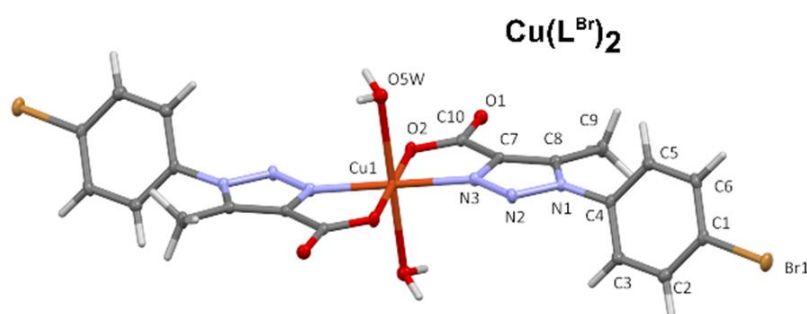

CCDC 2171641



### 1.6. Synthesis of copper (II) complex $\text{Cu}(\text{L}^{\text{OMe}})_2$

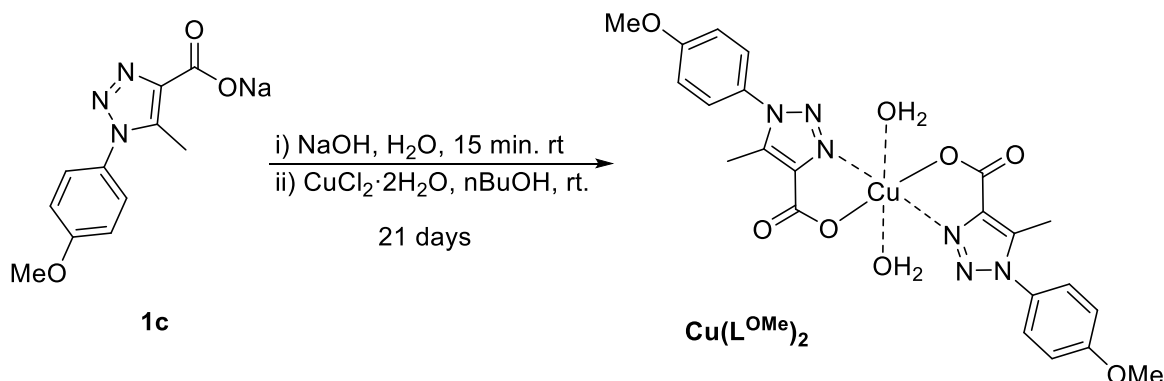

A solution of  $\text{CuCl}_2 \cdot 2\text{H}_2\text{O}$  (7.31 mg, 42.88  $\mu\text{mol}$ ) in  $n\text{BuOH}$  (8 mL) was carefully added to a solution of 1-(4-methoxyphenyl)-5-methyl-1*H*-1,2,3-triazole-4-carboxylic acid (**1c**) (20.0 mg, 85.75  $\mu\text{mol}$ ) in water (8 mL) contained in a vial, previously treated with NaOH (43.0  $\mu\text{L}$ , 2.0 M, 85.75  $\mu\text{mol}$ ) for 30 min. The vial was sealed, and blue single crystals of  $\text{Cu}(\text{L}^{\text{MeO}})_2$  were obtained 21 days (21.8 mg, 90%). **m.p.:** 225-230 °C (dec.). **IR** (KBr,  $\text{cm}^{-1}$ )  $\nu$ : 3540 and 3428 (O-H), 3054 ( $\text{C}_{\text{Ar}}\text{-H}$ ), 1634 (C=O), 1522 (N=N), 1246 (CO-O), 1021 ( $\text{C}_{\text{Ar}}\text{-OMe}$ ) (Figure S35). UV/Vis (DMF):  $\lambda_{\text{max}} = 265$  nm (Figure S6).  $\text{Cu}(\text{L}^{\text{OMe}})_2$  structure was confirmed by X-ray crystallography (CCDC 2171640).

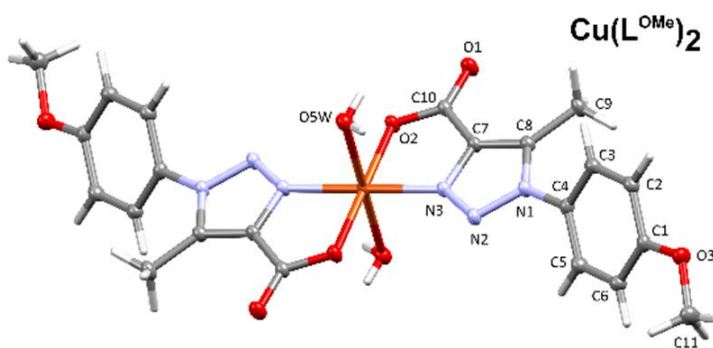

CCDC 2171640

## 2. Crystallography data of Cu(L<sup>NO2</sup>)<sub>2</sub>, Cu(L<sup>Br</sup>)<sub>2</sub> and Cu(L<sup>OMe</sup>)<sub>2</sub> complexes

**Table S1.** Data and experimental details for Cu(L<sup>NO2</sup>)<sub>2</sub>, Cu(L<sup>Br</sup>)<sub>2</sub> and Cu(L<sup>OMe</sup>)<sub>2</sub>

| Crystal data                                                                        | Cu(L <sup>NO2</sup> ) <sub>2</sub>                                                                                          | Cu(L <sup>Br</sup> ) <sub>2</sub>                                                                     | Cu(L <sup>OMe</sup> ) <sub>2</sub>                                                    |
|-------------------------------------------------------------------------------------|-----------------------------------------------------------------------------------------------------------------------------|-------------------------------------------------------------------------------------------------------|---------------------------------------------------------------------------------------|
| Ideal formula                                                                       | C <sub>20</sub> H <sub>18</sub> CuN <sub>8</sub> O <sub>10</sub> , 2(C <sub>3</sub> H <sub>7</sub> NO), 2(H <sub>2</sub> O) | C <sub>20</sub> H <sub>18</sub> Br <sub>2</sub> CuN <sub>6</sub> O <sub>6</sub> , 3(H <sub>2</sub> O) | C <sub>22</sub> H <sub>24</sub> CuN <sub>6</sub> O <sub>8</sub> , 2(H <sub>2</sub> O) |
| Crystal system, Space group                                                         | P-1                                                                                                                         | P-1                                                                                                   | P 21/c                                                                                |
| Crystal size (mm)                                                                   | 0.10 × 0.09 × 0.04                                                                                                          | 0.08 × 0.07 × 0.03                                                                                    | 0.10 × 0.09 × 0.04                                                                    |
| Temperature (K)                                                                     | 100                                                                                                                         | 100                                                                                                   | 100                                                                                   |
| <i>a, b, c</i> (Å)                                                                  | 7.3942(4), 8.0737(4), 15.2816(8)                                                                                            | 7.2584(4), 11.4225(6), 16.6484(8)                                                                     | 11.7258(5), 10.2545(4), 10.9905(4)                                                    |
| <i>α, β, γ</i> (°)                                                                  | 102.804(2), 92.714(2), 109.580(2),                                                                                          | 105.3322(18), 98.0427(18), 100.6246(18)                                                               | 90, 107.7260(10), 90                                                                  |
| <i>V</i> (Å <sup>3</sup> )                                                          | 830.79(8)                                                                                                                   | 1282.18(12)                                                                                           | 1258.78(9)                                                                            |
| <i>Z</i>                                                                            | 1                                                                                                                           | 2                                                                                                     | 2                                                                                     |
| Calculated density (g cm <sup>-3</sup> )                                            | 1.551                                                                                                                       | 1.854                                                                                                 | 1.583                                                                                 |
| <i>μ</i> (mm <sup>-1</sup> )                                                        | 0.741                                                                                                                       | 4.03                                                                                                  | 0.936                                                                                 |
| <b>Data Collection</b>                                                              |                                                                                                                             |                                                                                                       |                                                                                       |
| Θ range (°)                                                                         | 2.76 to 28.27                                                                                                               | 1.95 to 28.28                                                                                         | 2.70 to 30.03                                                                         |
| Absorption correction                                                               | multi-scan Bruker Sadabs-2016/2                                                                                             |                                                                                                       |                                                                                       |
| T <sub>min</sub> , T <sub>max</sub>                                                 | 0.9171, 0.9705                                                                                                              | 0.7771, 0.8496                                                                                        | 0.942, 0.877                                                                          |
| N <sup>o</sup> . of measured, independent and observed [ <i>I</i> > 2σ] reflections | 30694, 4111, 3732                                                                                                           | 50780, 6375, 5178                                                                                     | 24114, 3673, 3150                                                                     |
| [ <i>R</i> <sub>int</sub> ]                                                         | 0.0387                                                                                                                      | 0.042                                                                                                 |                                                                                       |
| Data completeness to 28.27°θ (%)                                                    | 99.9                                                                                                                        | 99.9                                                                                                  | 99.8                                                                                  |
| <b>Refinement</b>                                                                   |                                                                                                                             |                                                                                                       |                                                                                       |
| Refinement                                                                          | Full-matrix least squares on F <sup>2</sup>                                                                                 |                                                                                                       |                                                                                       |
| Number of reflections, parameters, restraints                                       | 4111, 251, 0                                                                                                                | 6375, 387, 9                                                                                          | 3673, 192, 0                                                                          |
| <i>R</i> <sub>1</sub> (all), <i>wR</i> <sub>2</sub> (all)                           | 0.0328, 0.0673                                                                                                              | 0.0378, 0.0681                                                                                        | 0.0447, 0.0921                                                                        |
| <i>R</i> <sub>1</sub> [ <i>I</i> > 2σ( <i>I</i> )], <i>wR</i> <sub>2</sub>          | 0.0275, 0.0645                                                                                                              | 0.0263, 0.062                                                                                         | 0.034, 0.0831                                                                         |
| GoF                                                                                 | 1.047                                                                                                                       | 1.037                                                                                                 | 1.05                                                                                  |
| Δρ <sub>max</sub> (eÅ <sup>-3</sup> )/Δρ <sub>min</sub> (eÅ <sup>-3</sup> )         | 0.37/-0.39                                                                                                                  | 0.91/-0.37                                                                                            | 1.38/-0.63                                                                            |

**Table S2.** Hydrogen Bonds distances (Å) and angles (°) for Cu(L<sup>NO2</sup>)<sub>2</sub>, Cu(L<sup>Br</sup>)<sub>2</sub> and Cu(L<sup>OMe</sup>)<sub>2</sub>

| Donor-H..Acceptor                                                                                                                     | D - H     | H...A     | D...A      | D-H...A |
|---------------------------------------------------------------------------------------------------------------------------------------|-----------|-----------|------------|---------|
| <b>Cu(L<sup>NO2</sup>)<sub>2</sub></b>                                                                                                |           |           |            |         |
| O5W-H51..O1 <sup>i</sup>                                                                                                              | 0.83(2)   | 1.97(2)   | 2.7841(14) | 166(2)  |
| O5W-H52..O7                                                                                                                           | 0.84(2)   | 1.93(2)   | 2.7698(15) | 176(2)  |
| O6W-H61..O7                                                                                                                           | 0.84(2)   | 2.13(2)   | 2.9459(16) | 167(2)  |
| O6W-H62..O1 <sup>i</sup>                                                                                                              | 0.85(2)   | 2.01(2)   | 2.8558(15) | 170(2)  |
| Symmetry code: i (1-x,2-y,1-z) ii()                                                                                                   |           |           |            |         |
| <b>Cu(L<sup>Br</sup>)<sub>2</sub></b>                                                                                                 |           |           |            |         |
| (O6W-H62A)_3..O2_2                                                                                                                    | 0.862(17) | 1.992(18) | 2.840(2)   | 167(3)  |
| (O6W-H61A)_3^a..O8W                                                                                                                   | 3 0.90(2) | 1.92(3)   | 2.787(3)   | 161(6)  |
| (O6W-H61B)_3^b..O7W_3                                                                                                                 | 0.90(2)   | 2.17(5)   | 2.816(3)   | 128(5)  |
| (O7W-H71A)_3^a..O6W_3                                                                                                                 | 0.86(2)   | 1.97(2)   | 2.816(3)   | 169(6)  |
| (O8W-H81B)_3^b..O6W_3                                                                                                                 | 0.907(19) | 2.05(4)   | 2.787(3)   | 138(5)  |
| (O8W-H82A)_3..O1_1                                                                                                                    | 0.865(17) | 1.907(18) | 2.763(2)   | 170(3)  |
| (O5W-H5A)_2..O7W_3 <sup>i</sup>                                                                                                       | 0.79(3)   | 2.05(3)   | 2.826(2)   | 172(3)  |
| (O7W-H72A)_3..N2_1 <sup>ii</sup>                                                                                                      | 0.828(17) | 2.38(2)   | 3.147(3)   | 155(3)  |
| (O5W- H5B)_2..O1_2 <sup>iii</sup>                                                                                                     | 0.78(3)   | 2.00(3)   | 2.772(2)   | 172(3)  |
| (C9-H9B)_1..Br1_2 <sup>iv</sup>                                                                                                       | 0.98      | 2.88      | 3.826(2)   | 163.7   |
| (O5W- H51A)_1..O1_1 <sup>v</sup>                                                                                                      | 0.80(3)   | 1.96(3)   | 2.762(2)   | 175(3)  |
| (O5W-H51B)_1..O6W_3 <sup>v</sup>                                                                                                      | 0.78(3)   | 2.26(3)   | 3.005(2)   | 161(3)  |
| (O8W-H81A)_3^a..O7W_3 <sup>v</sup>                                                                                                    | 0.89(2)   | 1.97(2)   | 2.860(3)   | 171(6)  |
| (O7W-H71B)_3^b..O8W_3 <sup>vi</sup>                                                                                                   | 0.85(2)   | 2.13(4)   | 2.860(3)   | 143(6)  |
| Symmetry codes: (i) -x+2, -y+1, -z+1; (ii) -x+1, -y+1, -z+2; (iii) -x+1, -y+1, -z+1; (iv) x, y-1, z+1; (v) x-1, y, z; (vi) x+1, y, z. |           |           |            |         |
| <b>Cu(L<sup>OMe</sup>)<sub>2</sub></b>                                                                                                |           |           |            |         |
| O5W-H51W..O1 <sup>i</sup>                                                                                                             | 0.80(2)   | 2.06(2)   | 2.8553(18) | 174(2)  |
| O5W-H52W..O6W <sup>ii</sup>                                                                                                           | 0.73(3)   | 2.14(3)   | 2.818(2)   | 155(2)  |
| O6W-H61W..O2 <sup>iii</sup>                                                                                                           | 0.82(3)   | 2.00(3)   | 2.8205(19) | 175(3)  |
| O6W-H62W..O1 <sup>iv</sup>                                                                                                            | 0.79(3)   | 2.15(3)   | 2.8962(19) | 159(3)  |
| C3-H3..O5W <sup>iv</sup>                                                                                                              | 0.95      | 2.48      | 3.400(2)   | 163     |

|                                                                                                                 |      |      |          |     |
|-----------------------------------------------------------------------------------------------------------------|------|------|----------|-----|
| C9-H9B..O3 <sup>v</sup>                                                                                         | 0.98 | 2.50 | 3.165(2) | 125 |
| Symmetry codes: (i) -x,-1/2+y,1/2-z, (ii) x,1/2-y,-1/2+z, (iii) -x,1-y,1-z, (iv) x,3/2-y,1/2+z, (v) 1-x,2-y,2-z |      |      |          |     |

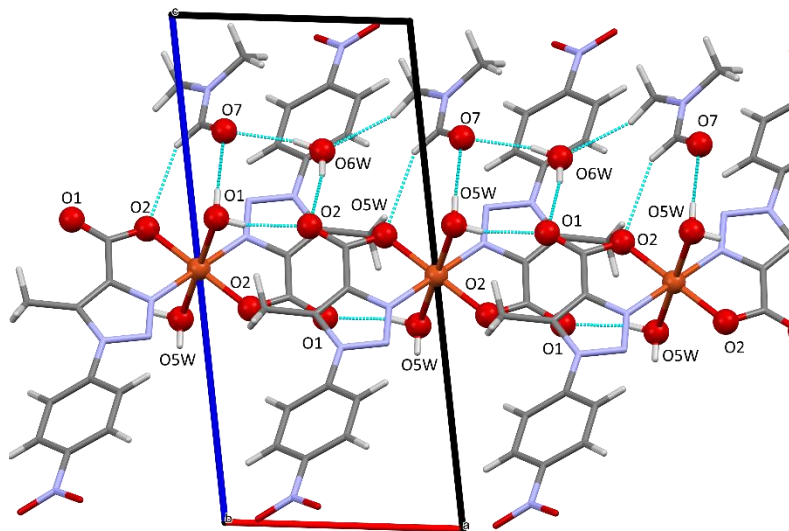

**Figure S1.** Infinite chain along [1 0 0] direction for  $\text{Cu}(\text{L}^{\text{NO}_2})_2$ . Symmetry codes omitted for clarify

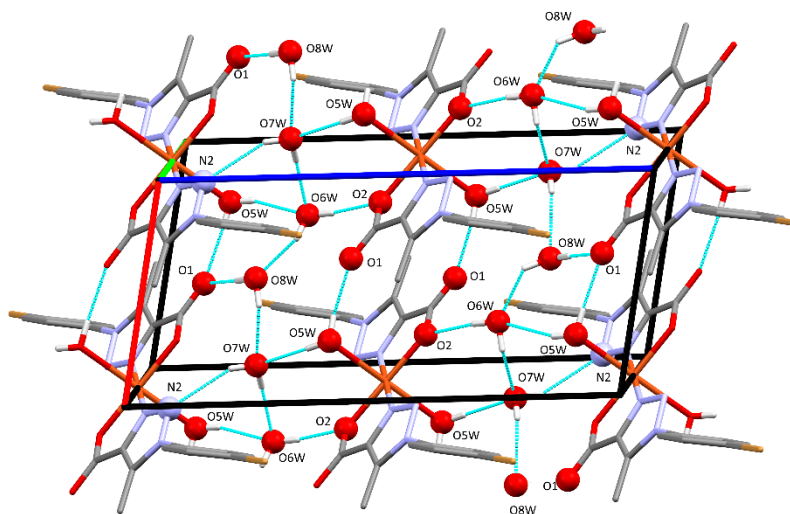

**Figure S2.** Projection along b-axis with 2D-Networks along ac plane for  $\text{Cu}(\text{L}^{\text{Br}})_2$ .  
Symmetry codes omitted for clarify

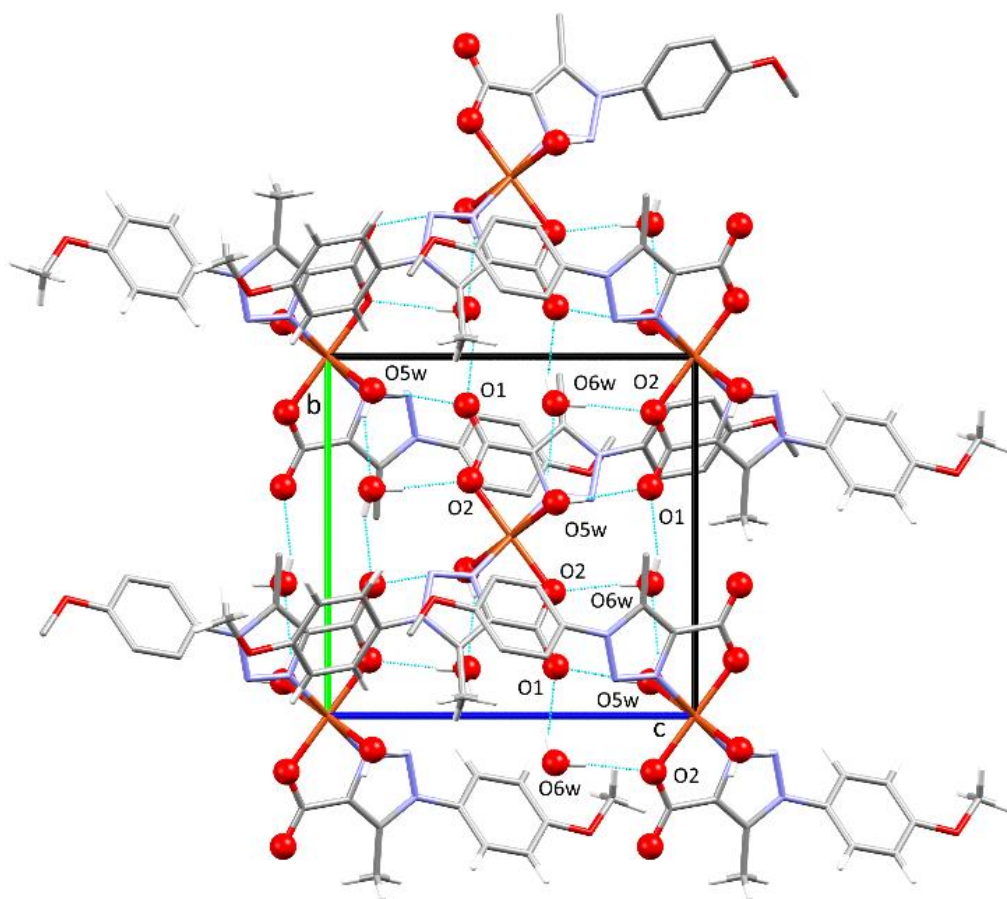

**Figure S3.** Projection along a-axis with 2D-Networks along bc plane for  $\text{Cu}(\text{L}^{\text{OMe}})_2$ .  
Symmetry codes omitted for clarify

**Table S3.** Selected geometric parameters bonds (Å) and angles (°) for Cu(L<sup>NO2</sup>)<sub>2</sub>, Cu(L<sup>Br</sup>)<sub>2</sub> and Cu(L<sup>MeO</sup>)<sub>2</sub>

|                         | Cu(L <sup>NO2</sup> ) <sub>2</sub> | Cu(L <sup>Br</sup> ) <sub>2</sub> _A | Cu(L <sup>Br</sup> ) <sub>2</sub> _B | Cu(L <sup>OMe</sup> ) <sub>2</sub> |
|-------------------------|------------------------------------|--------------------------------------|--------------------------------------|------------------------------------|
| Cu1-O2                  | 1.9701(9)                          | 1.9519(14)                           | 1.9761(14)                           | 1.9816(12)                         |
| Cu1-O2i                 | 1.9701(9)                          | 1.9520(14)                           | 1.9761(14)                           | 1.9816(12)                         |
| Cu1-N3                  | 1.9959(11)                         | 2.0212(17)                           | 2.0012(17)                           | 1.9837(14)                         |
| Cu1-N3i                 | 1.9959(11)                         | 2.0213(17)                           | 2.0012(17)                           | 1.9837(14)                         |
| Cu1-O5W                 | 2.3940(11)                         | 2.3704(16)                           | 2.3545(16)                           | 2.4323(13)                         |
| Cu1-O5Wi                | 2.3940(11)                         | 2.3704(16)                           | 2.3545(16)                           | 2.4323(13)                         |
| N1-N2                   | 1.3611(15)                         | 1.356(2)                             | 1.357(2)                             | 1.3581(19)                         |
| N2-N3                   | 1.3002(16)                         | 1.308(2)                             | 1.305(2)                             | 1.3077(19)                         |
| O2-Cu1-O2 <sup>i</sup>  | 180                                | 180                                  | 180                                  | 180                                |
| O5-Cu1-O5w <sup>i</sup> | 180                                | 180                                  | 180                                  | 180                                |
| N3-Cu1-N3 <sup>i</sup>  | 180                                | 180                                  | 180                                  | 180                                |
| O2-Cu1-N3               | 82.72(4)                           | 82.82(6)                             | 82.37(6)                             | 82.39(5)                           |
| O2-Cu1-N3 <sup>i</sup>  | 97.28(4)                           | 97.18(6)                             | 97.63(6)                             | 97.61(5)                           |
| O2-Cu1 O5W              | 90.77(4)                           | 88.91(6)                             | 90.88(6)                             | 90.49(5)                           |
| O2-Cu1 O5W <sup>i</sup> | 89.23(4)                           | 91.09(6)                             | 89.12(6)                             | 89.51(5)                           |
| N3 Cu1 O5W              | 88.81(4)                           | 90.34(6)                             | 90.27(6)                             | 94.28(5)                           |
| N3 Cu1 O5W <sup>i</sup> | 91.19(4)                           | 89.66(6)                             | 89.73(6)                             | 85.72(5)                           |
| Symmetry codes: (i)     | 2-x, 2-y, 1-z                      | -x, 1-y, 2-z                         | 2-x, 1-y, 1-z                        | -x, 1-y, 1-z                       |

**Table S4.** coordination polyhedral parameters

|     | Cu(L <sup>NO2</sup> ) <sub>2</sub> | Cu(L <sup>Br</sup> ) <sub>2</sub> | Cu(L <sup>Br</sup> ) <sub>2</sub> | Cu(L <sup>OMe</sup> ) <sub>2</sub> |
|-----|------------------------------------|-----------------------------------|-----------------------------------|------------------------------------|
| Vp  | 12.6013                            | 12.3694                           | 12.3021                           | 12.4458                            |
| Qe  | 1.0274                             | 1.0203                            | 1.0193                            | 1.0223                             |
| BAV | 27.8032                            | 19.2271                           | 21.472                            | 20.0309                            |

### 3. Electronic absorption spectra (UV-Vis)

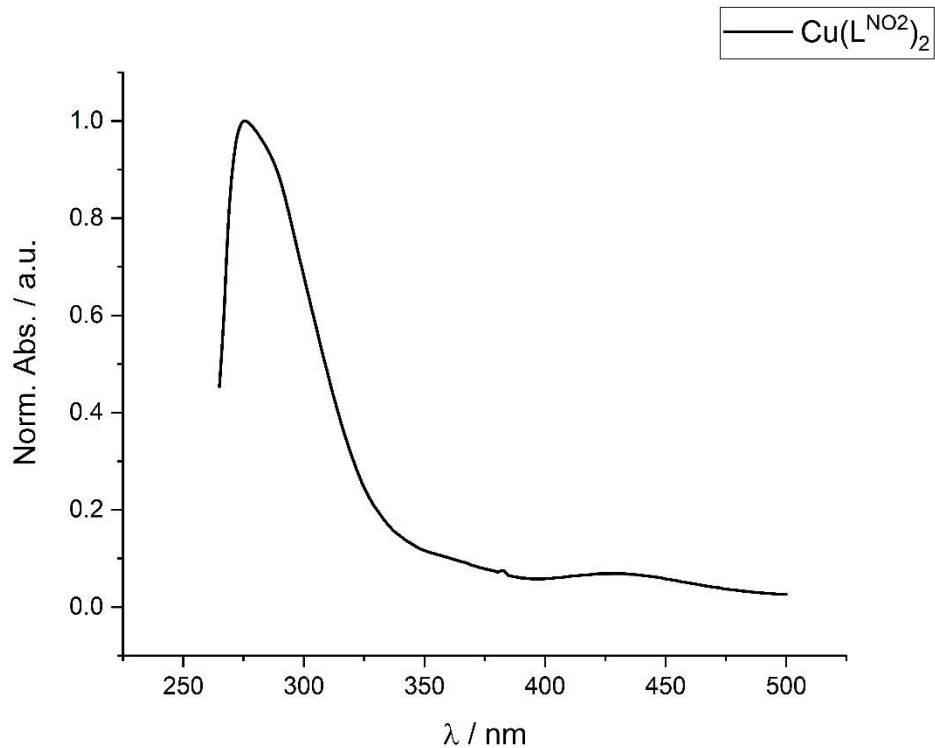

**Figure S4** Electronic spectra of  $\text{Cu}(\text{L}^{\text{NO}_2})_2$  recorded in DMF 10  $\mu\text{M}$ .

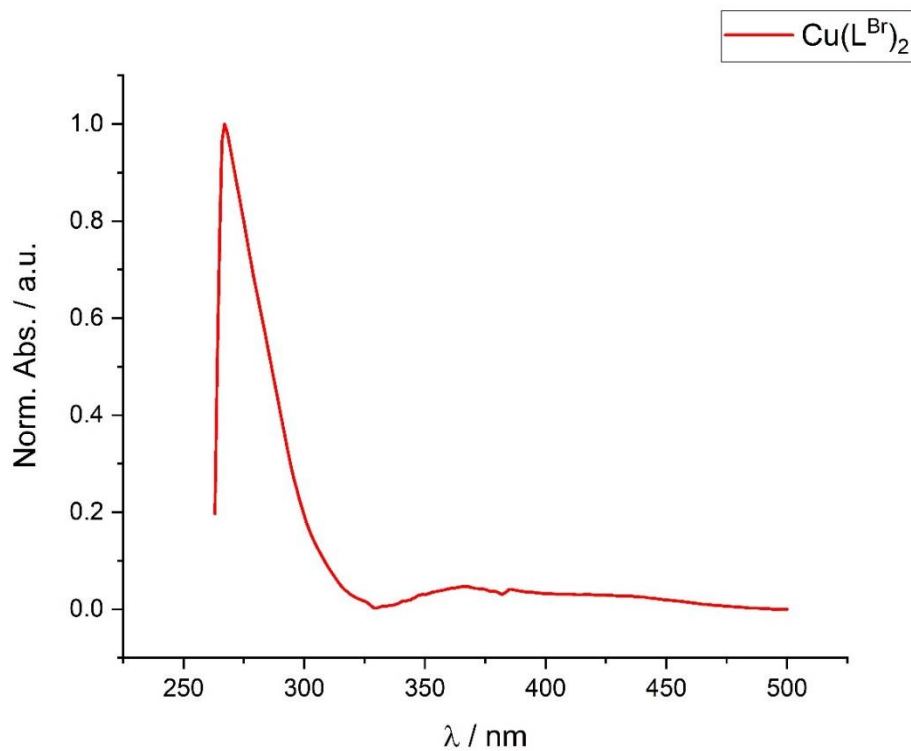

**Figure S5** Electronic spectra of  $\text{Cu}(\text{L}^{\text{Br}})_2$  recorded in DMF 10  $\mu\text{M}$ .



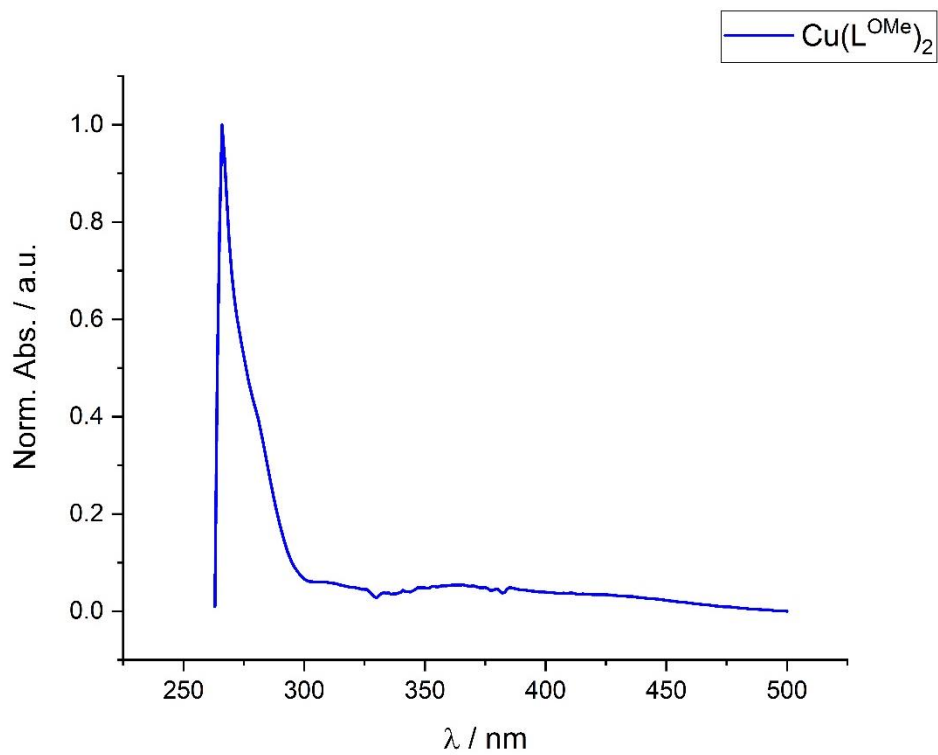

**Figure S6** Electronic spectra of  $\text{Cu}(\text{L}^{\text{OMe}})_2$  recorded in DMF 10  $\mu\text{M}$ .

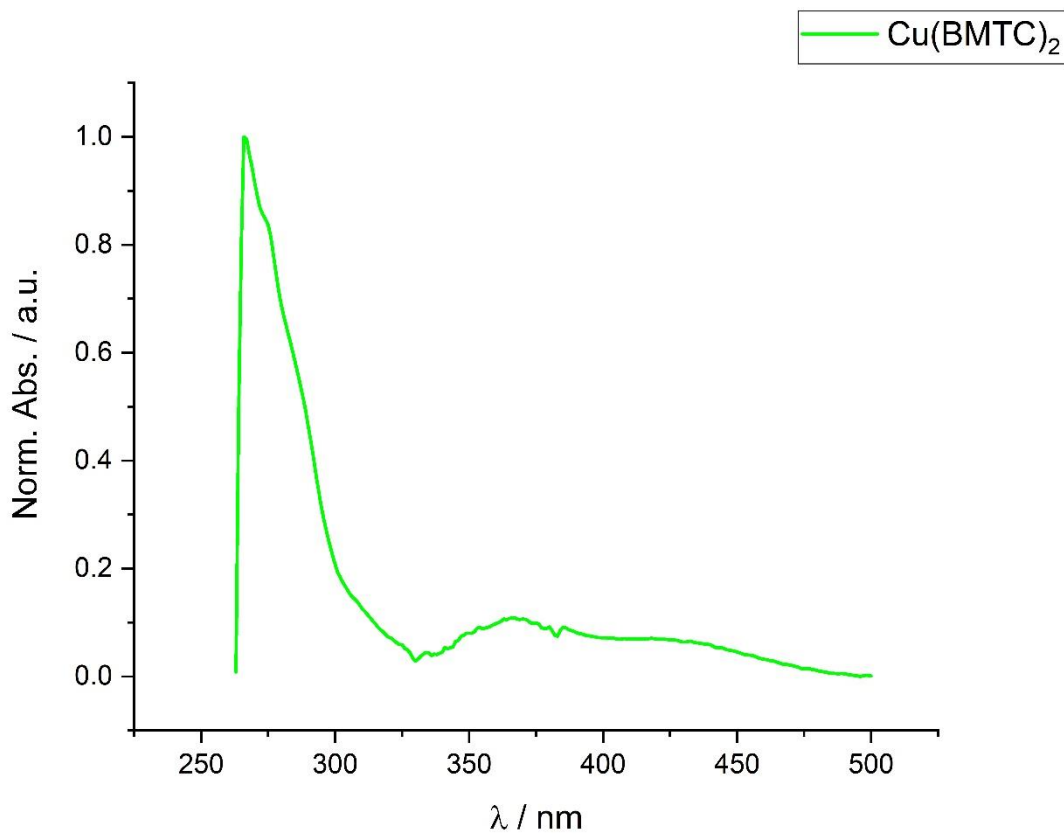

**Figure S7** Electronic spectra of  $\text{Cu}(\text{BMTC})_2$  recorded in DMF 10  $\mu\text{M}$ .

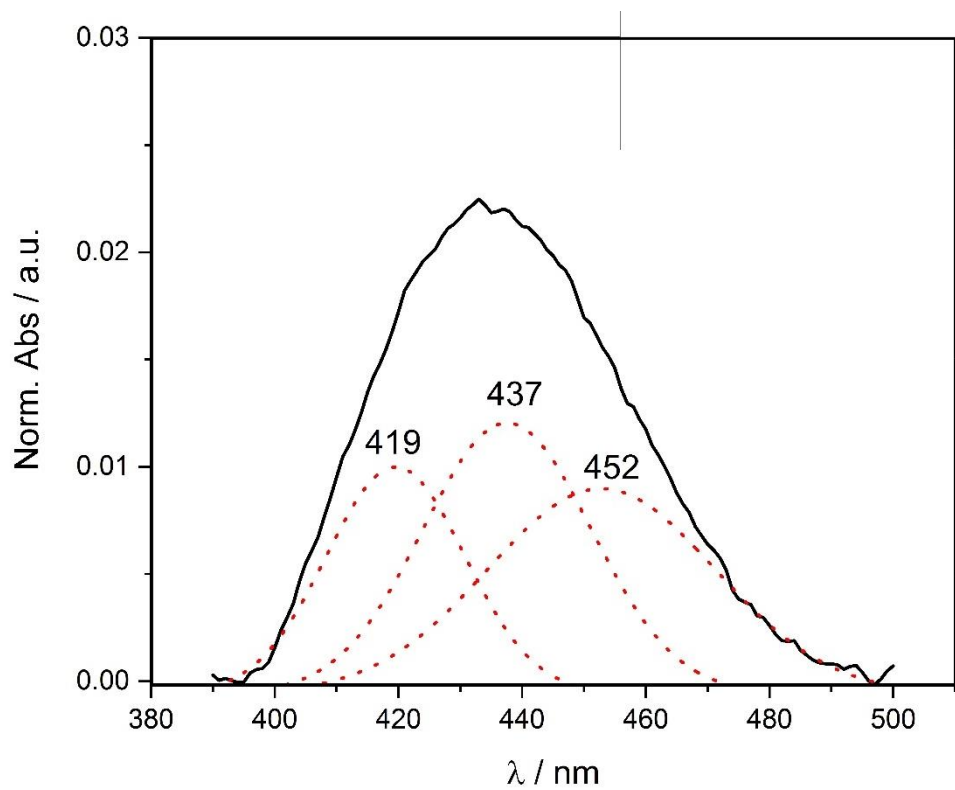

**Figure S8** *d-d* transition of  $\text{Cu}(\text{L}^{\text{NO}_2})_2$ .

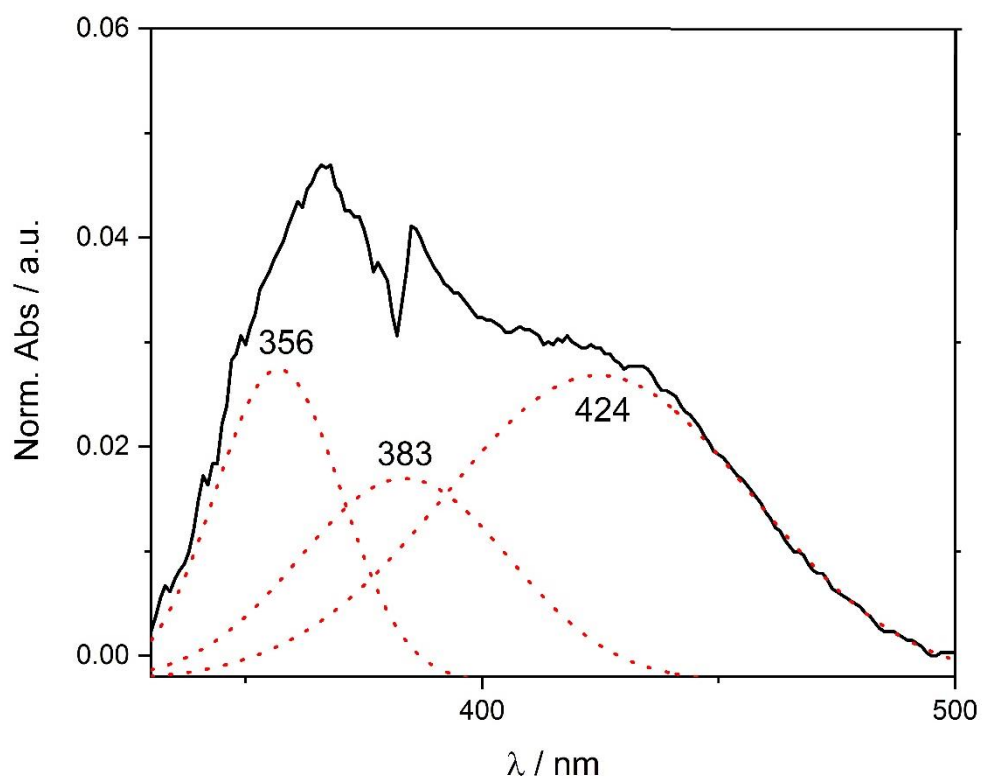

**Figure S9** *d-d* transition of  $\text{Cu}(\text{L}^{\text{Br}})_2$ .

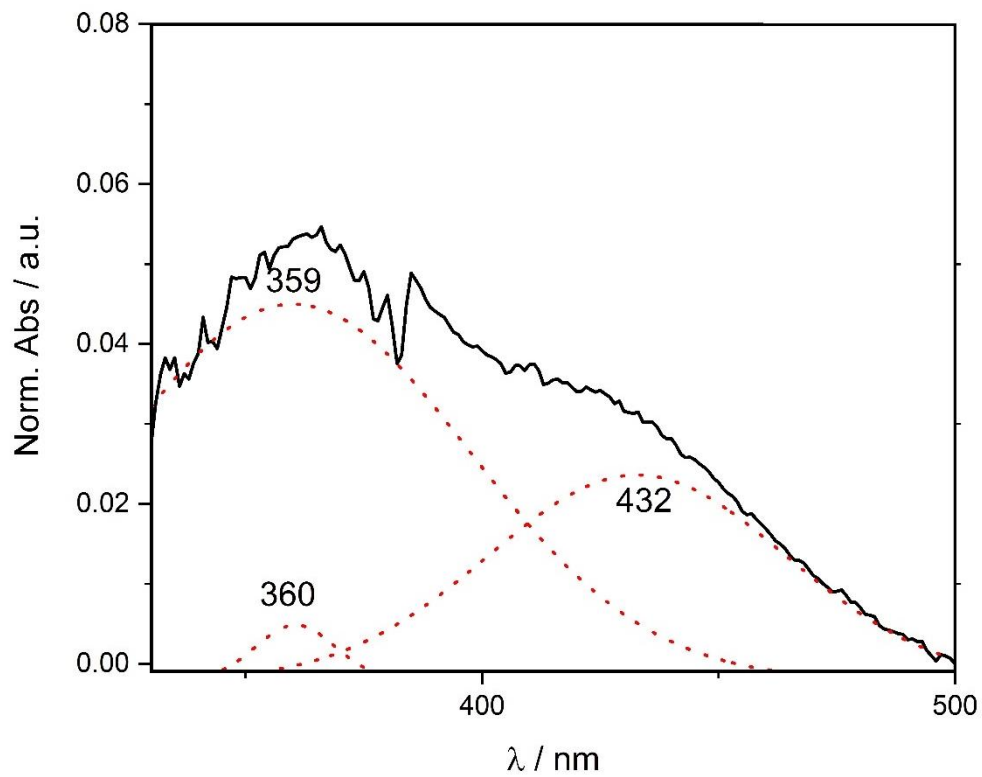

**Figure S10** *d-d* transition of  $\text{Cu}(\text{L}^{\text{OMe}})_2$ .

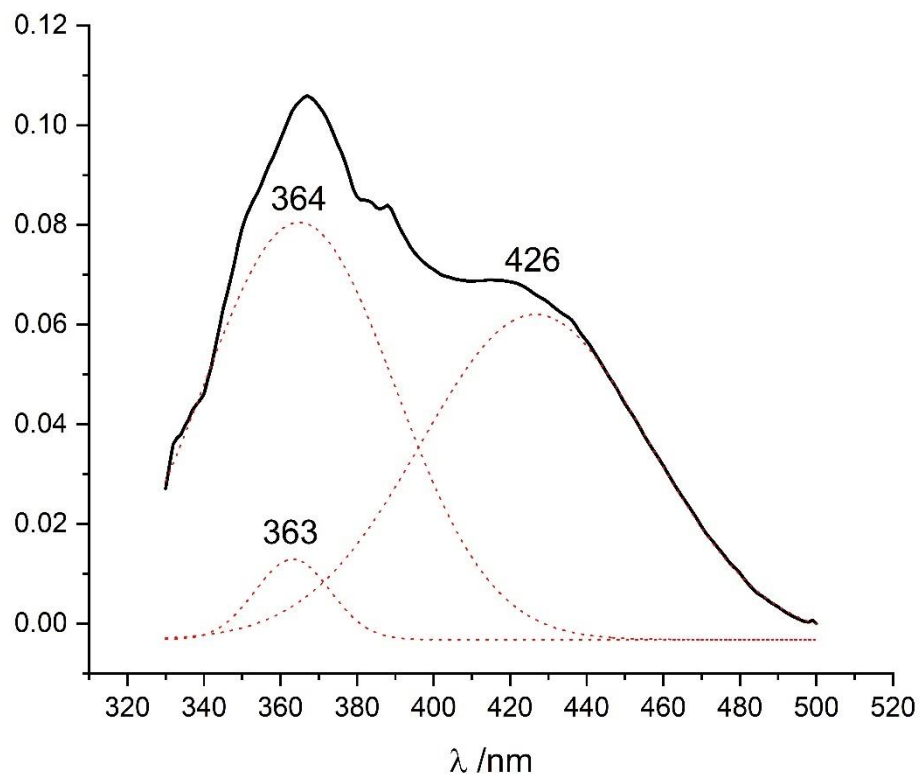

**Figure S11** *d-d* transition of  $\text{Cu}(\text{BMTC})_2$ .

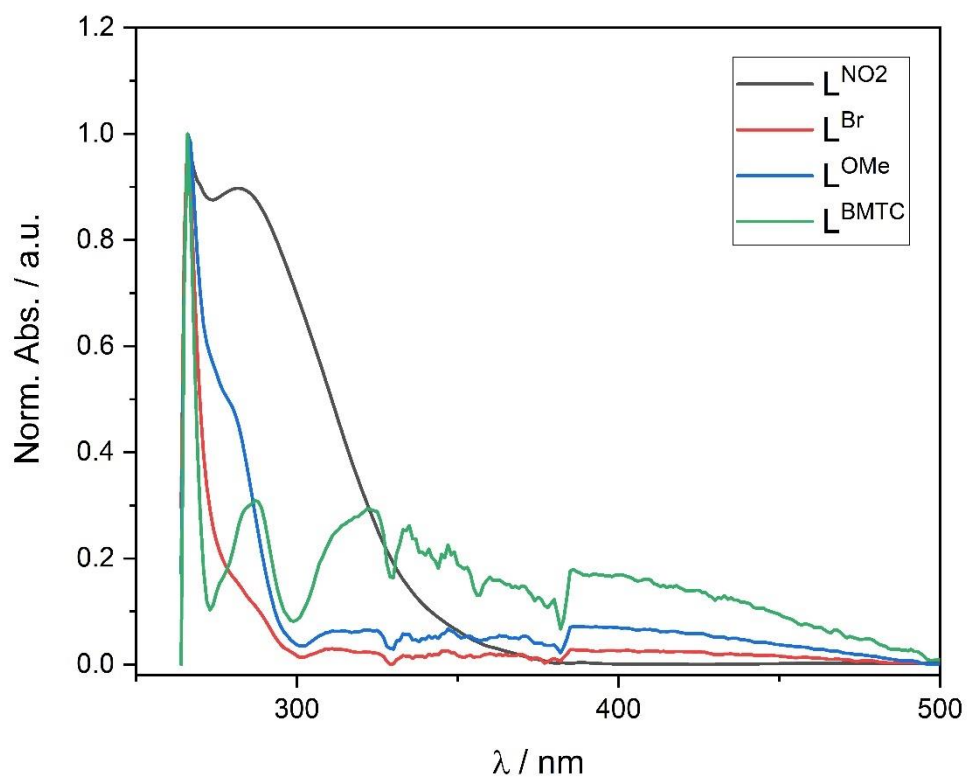

**Figure S12** Electronic spectra of Ligands recorded in DMF 10  $\mu$ M.

#### 4. Cyclic voltammogram characterization

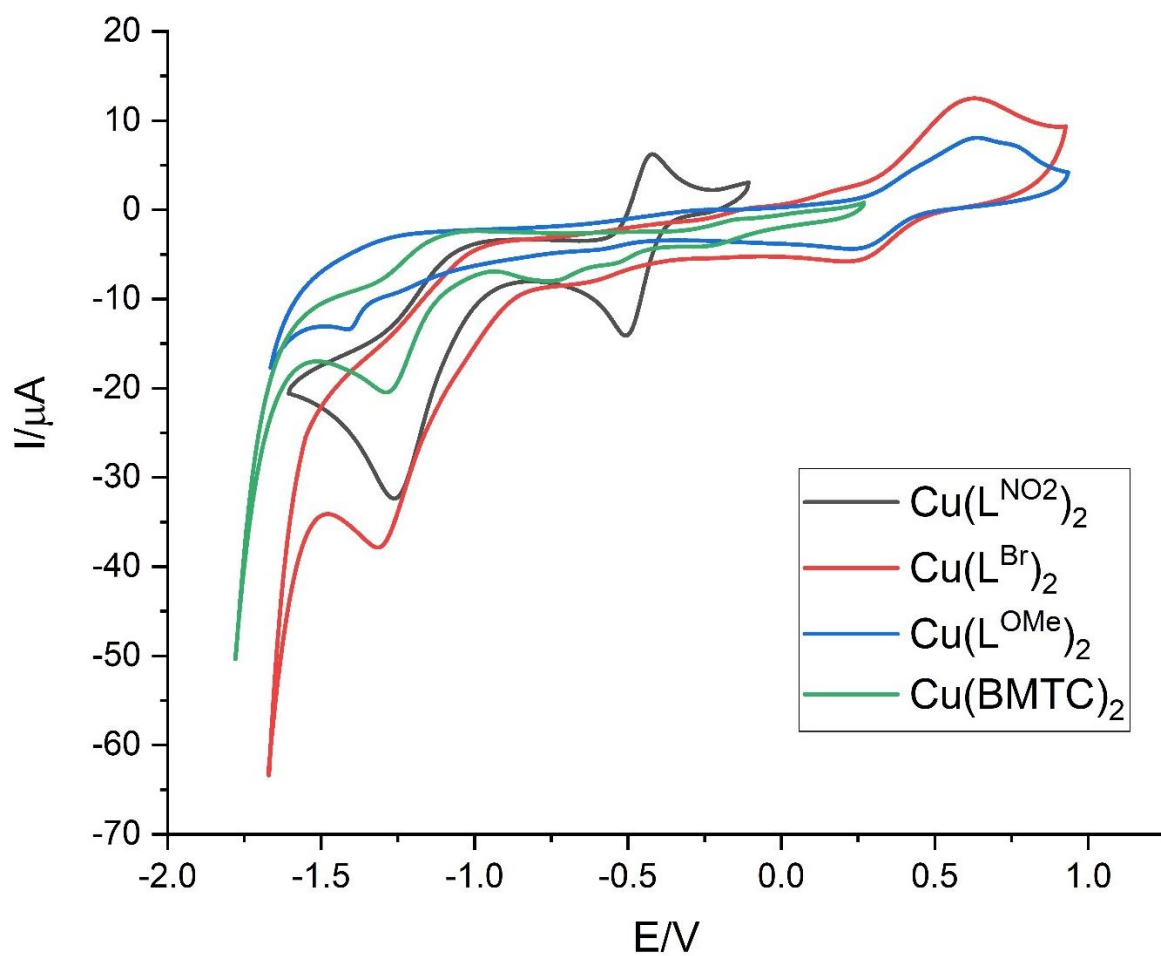

**Figure S13** Cyclic voltammograms of complexes  $\text{Cu}(\text{L}^{\text{NO}_2})_2$ ,  $\text{Cu}(\text{L}^{\text{Br}})_2$ , and  $\text{Cu}(\text{L}^{\text{OMe}})_2$ , and  $\text{Cu}(\text{BMTC})_2$ , recorded in DMF containing 0.1 M  $n\text{-Bu}_4\text{N}^+\text{PF}_6^-$  at a glassy carbon working electrode at 298 K,  $\nu = 100 \text{ mVs}^{-1}$ , reference electrode  $\text{Ag}/\text{Ag}^+$ , internal reference  $\text{Cp}_2\text{Fe}^{0/+}$ .

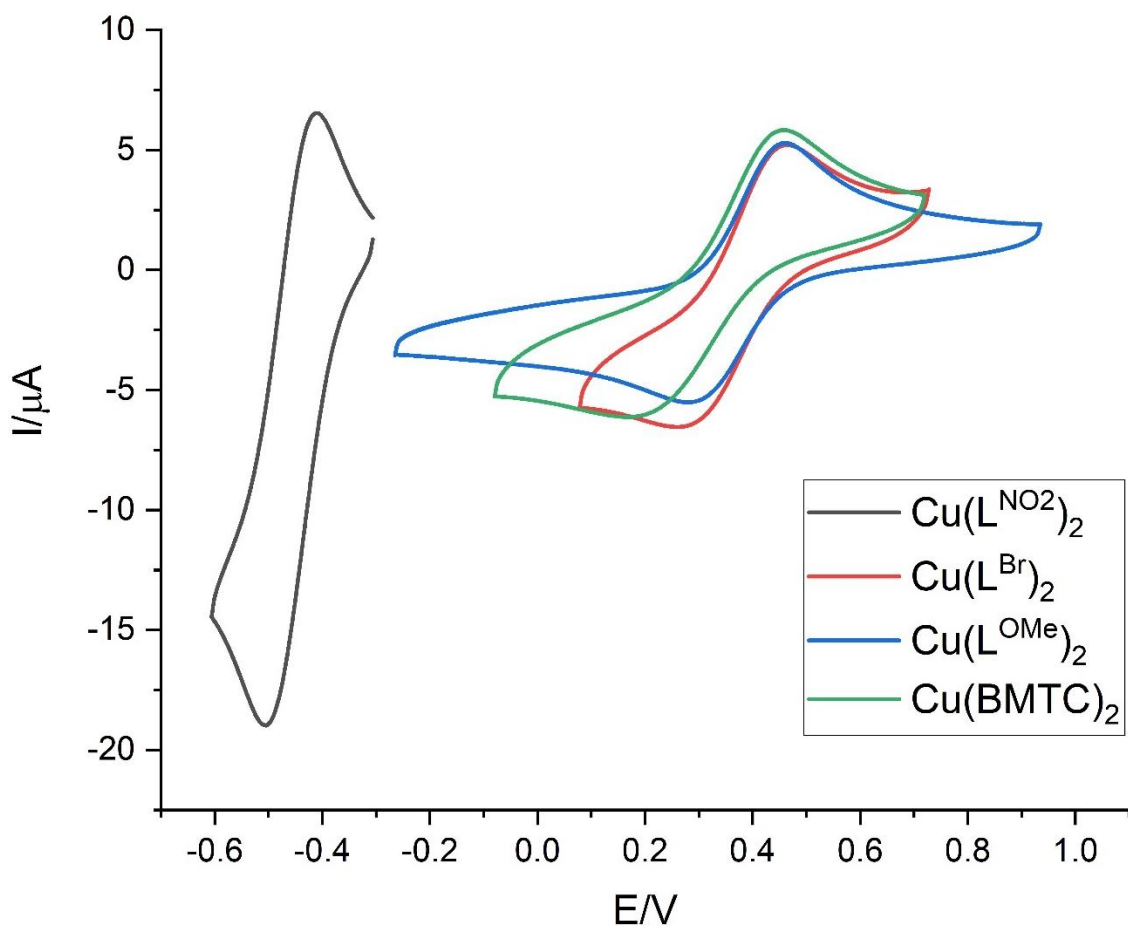

**Figure S14**  $\text{Cu}^{1+/2+}$  couple of complexes  $\text{Cu}(\text{L}^{\text{NO}_2})_2$ ,  $\text{Cu}(\text{L}^{\text{Br}})_2$ , and  $\text{Cu}(\text{L}^{\text{OMe}})_2$ , and  $\text{Cu}(\text{BMTC})_2$  in cyclic voltammograms recorded in DMF containing 0.1 M  $n\text{-Bu}_4\text{N}^+\text{PF}_6^-$  at a glassy carbon working electrode at 298 K,  $\nu = 100 \text{ mVs}^{-1}$ , reference electrode  $\text{Ag}/\text{Ag}^+$ , internal reference  $\text{Cp}_2\text{Fe}^{0/+}$ .

## 5. SEM

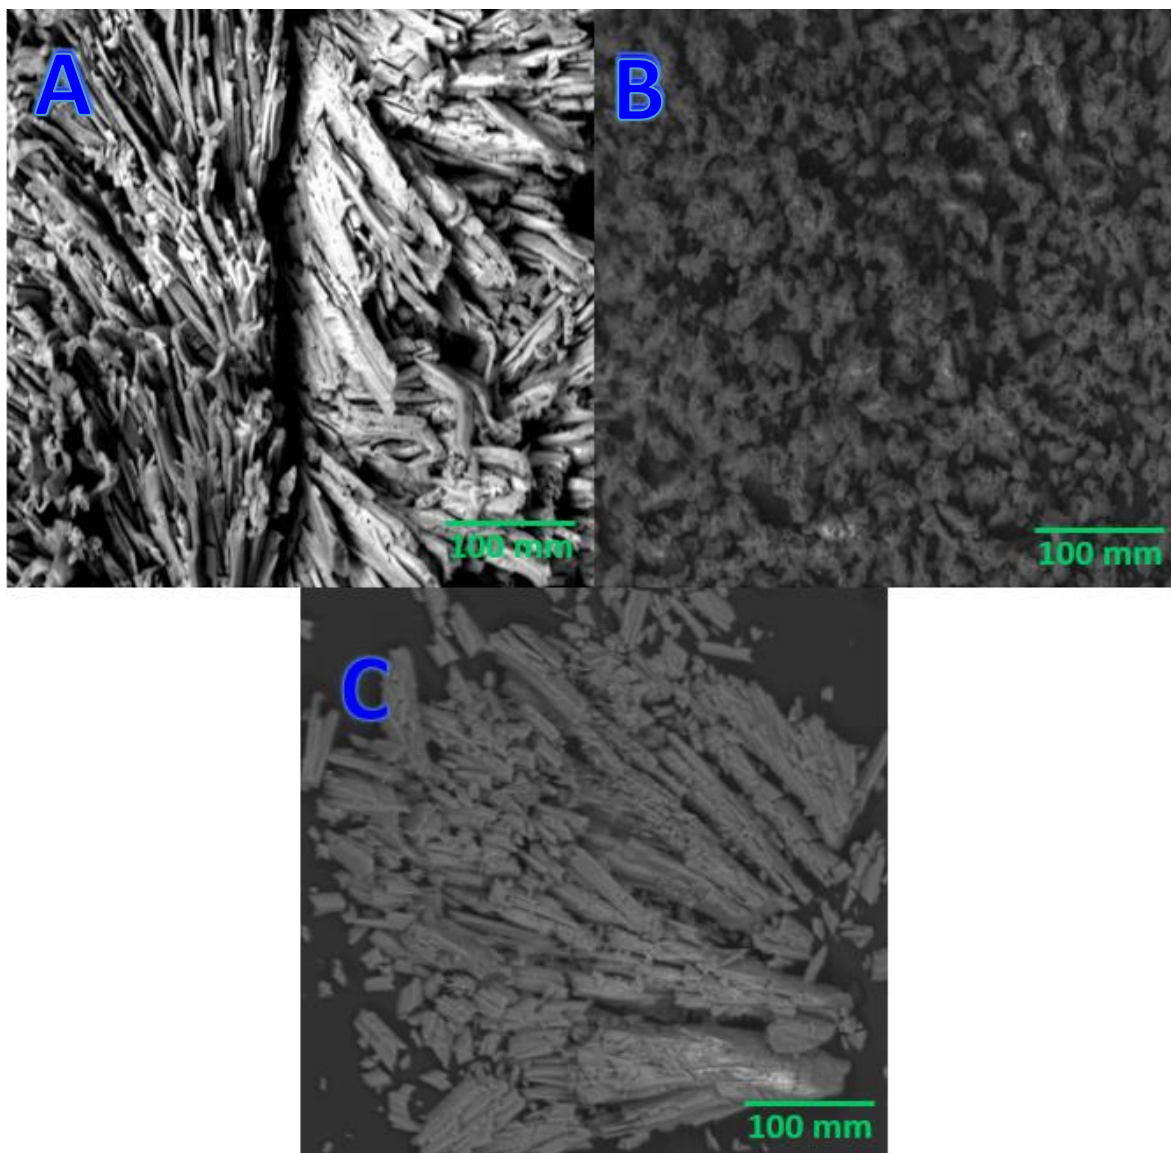

**Figure S15** FE-SEM image for  $\text{Cu}(\text{L}^{\text{OMe}})_2$  (A),  $\text{Cu}(\text{L}^{\text{Br}})_2$  (B) and  $\text{Cu}(\text{L}^{\text{NO}_2})_2$  (C).

## 6. IR and NMR Spectra

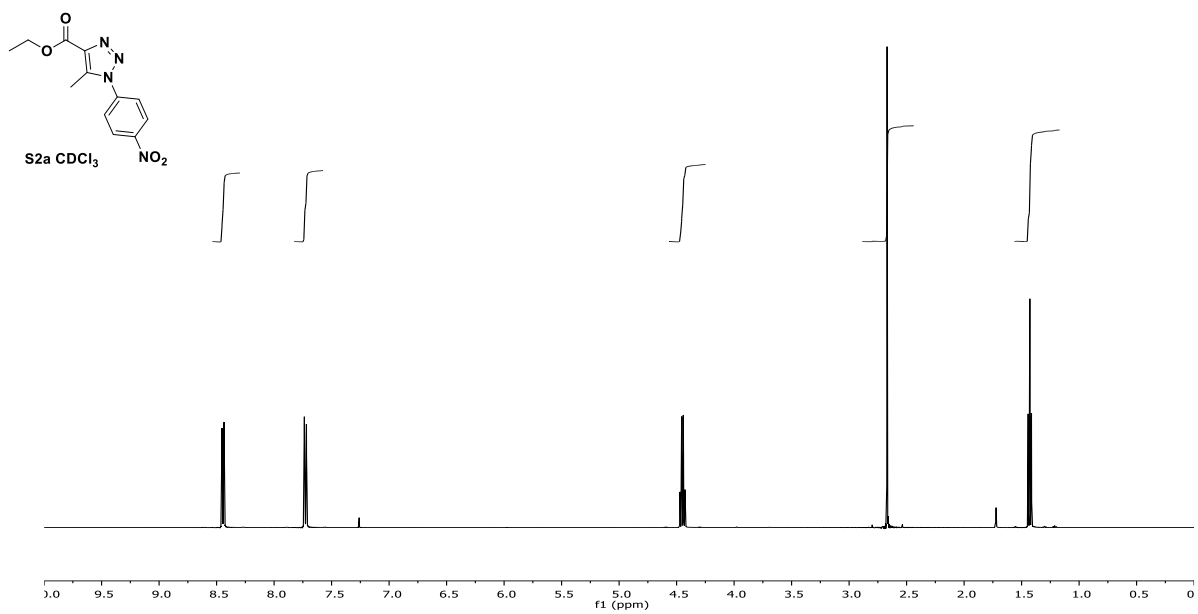

**Figure S16.**  $^1\text{H-NMR}$  of triazole **S2a**.

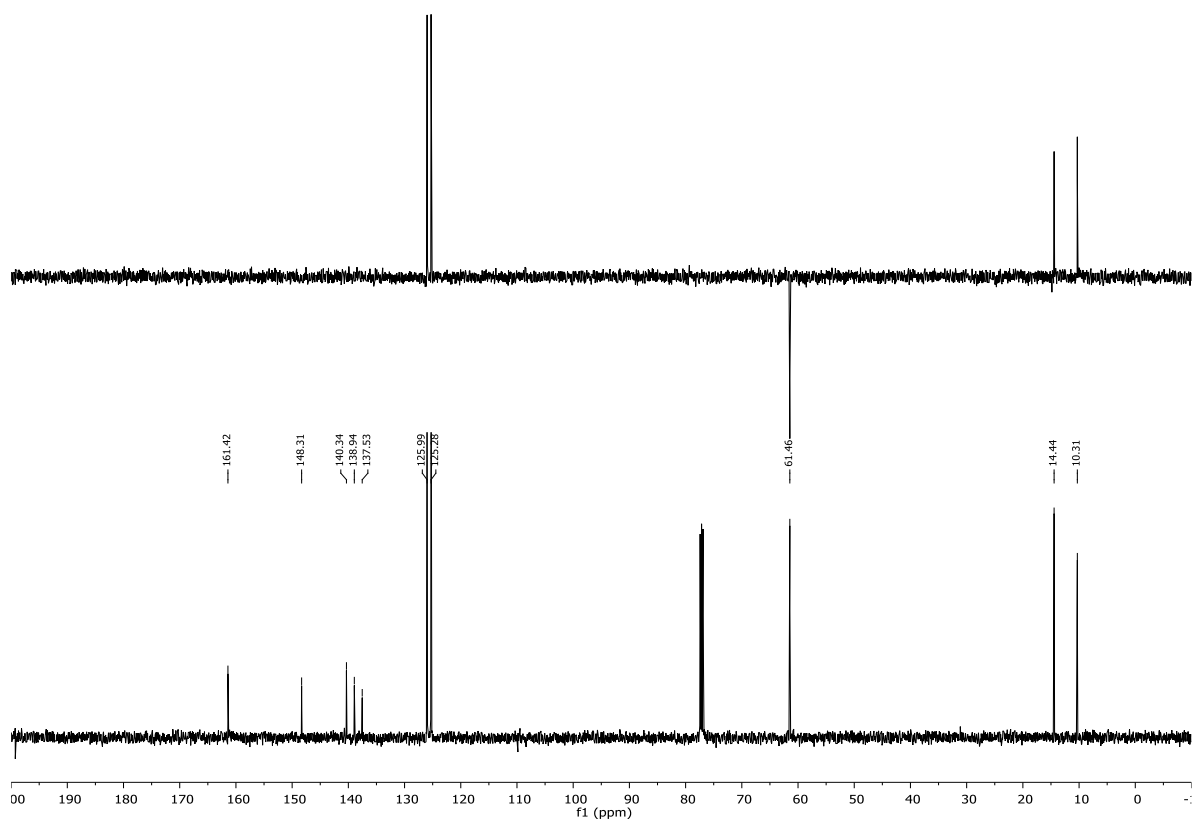

**Figure S17.**  $^{13}\text{C-NMR}$  and DEPT-135 of triazole **S2a**.



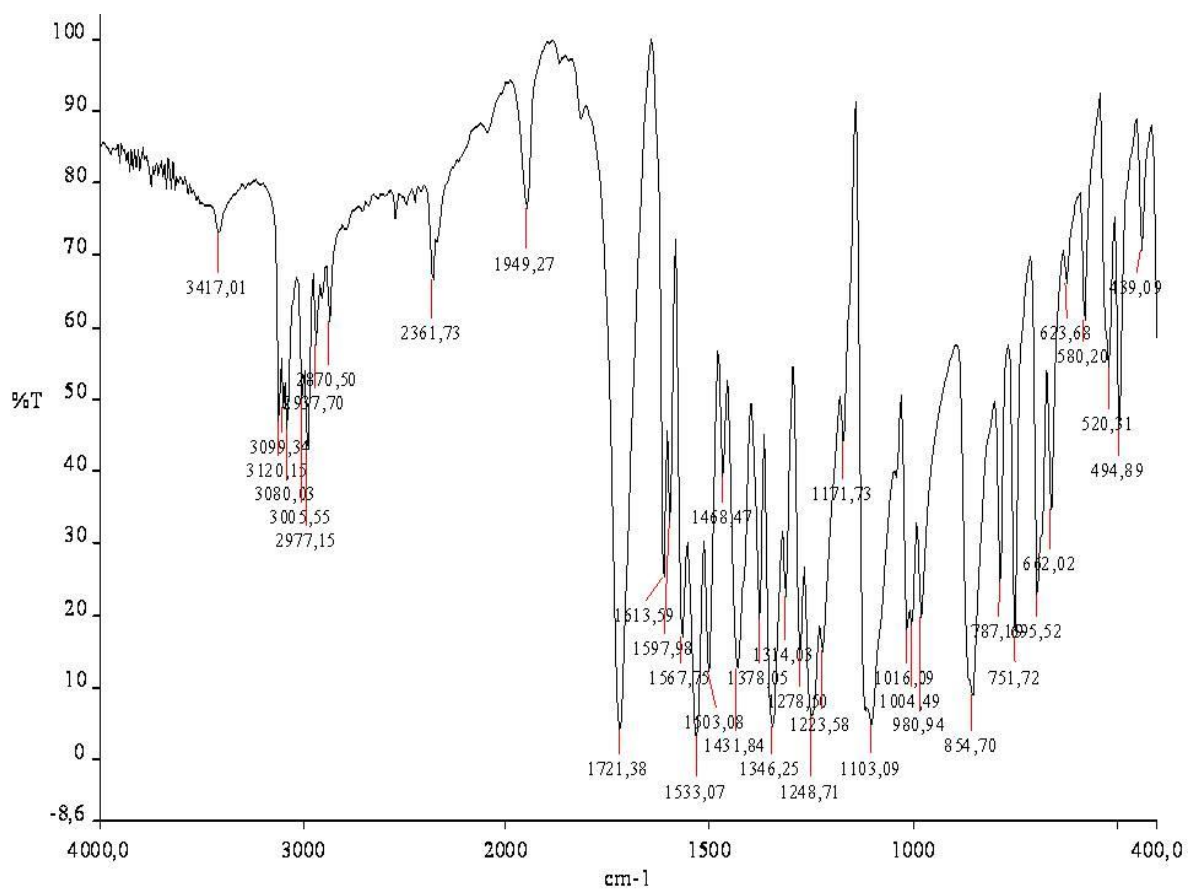

**Figure S18.** FT-IR of triazole S2a.

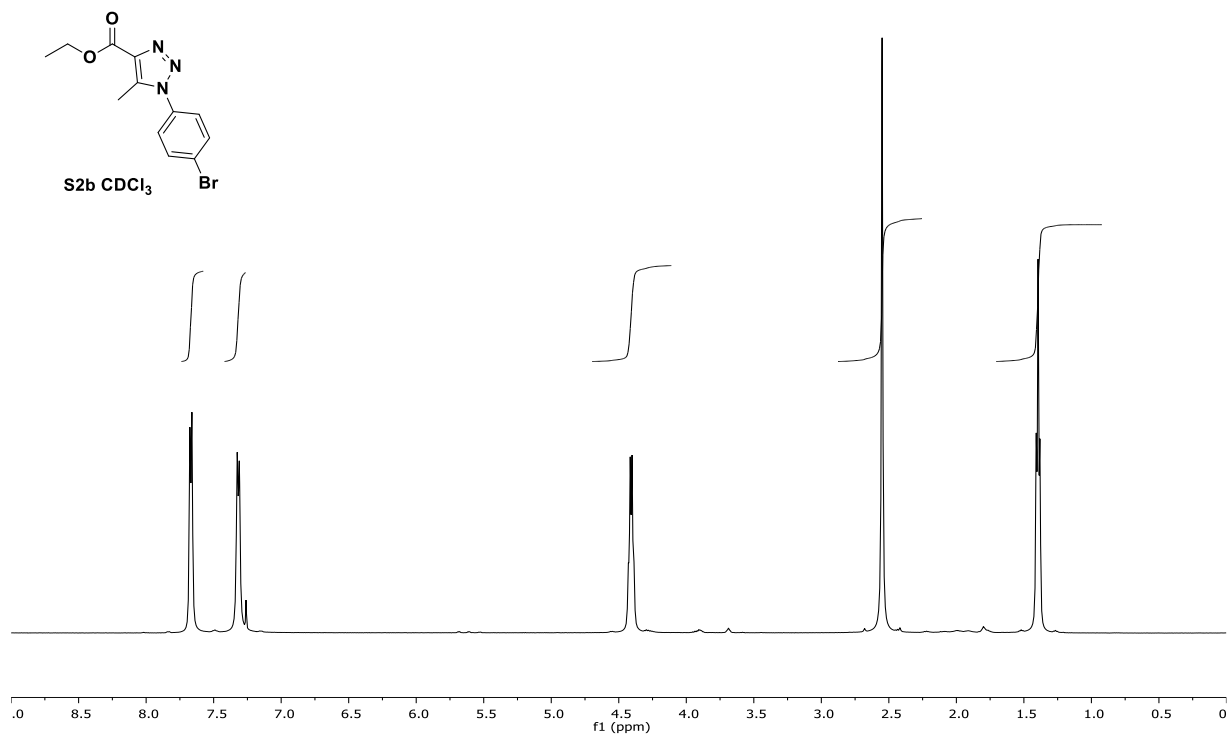

**Figure S19.** <sup>1</sup>H-NMR of triazole **S2b**.

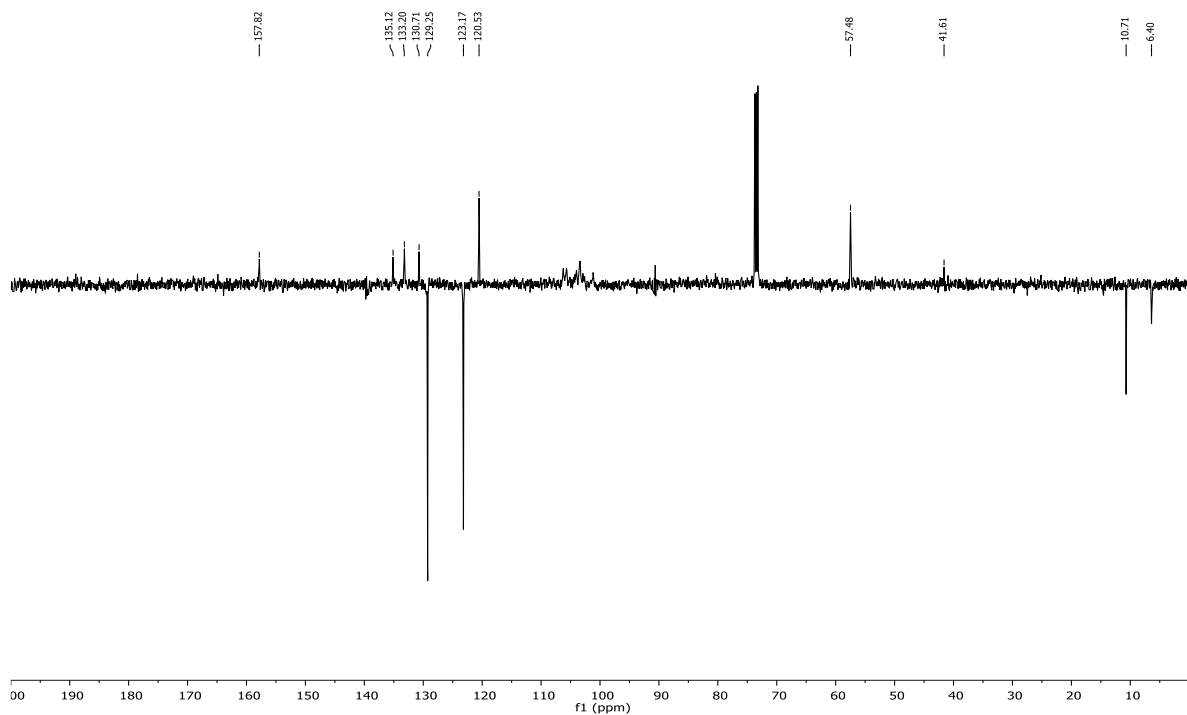

**Figure S20.** <sup>13</sup>C-NMR-APT of triazole **S2b**.

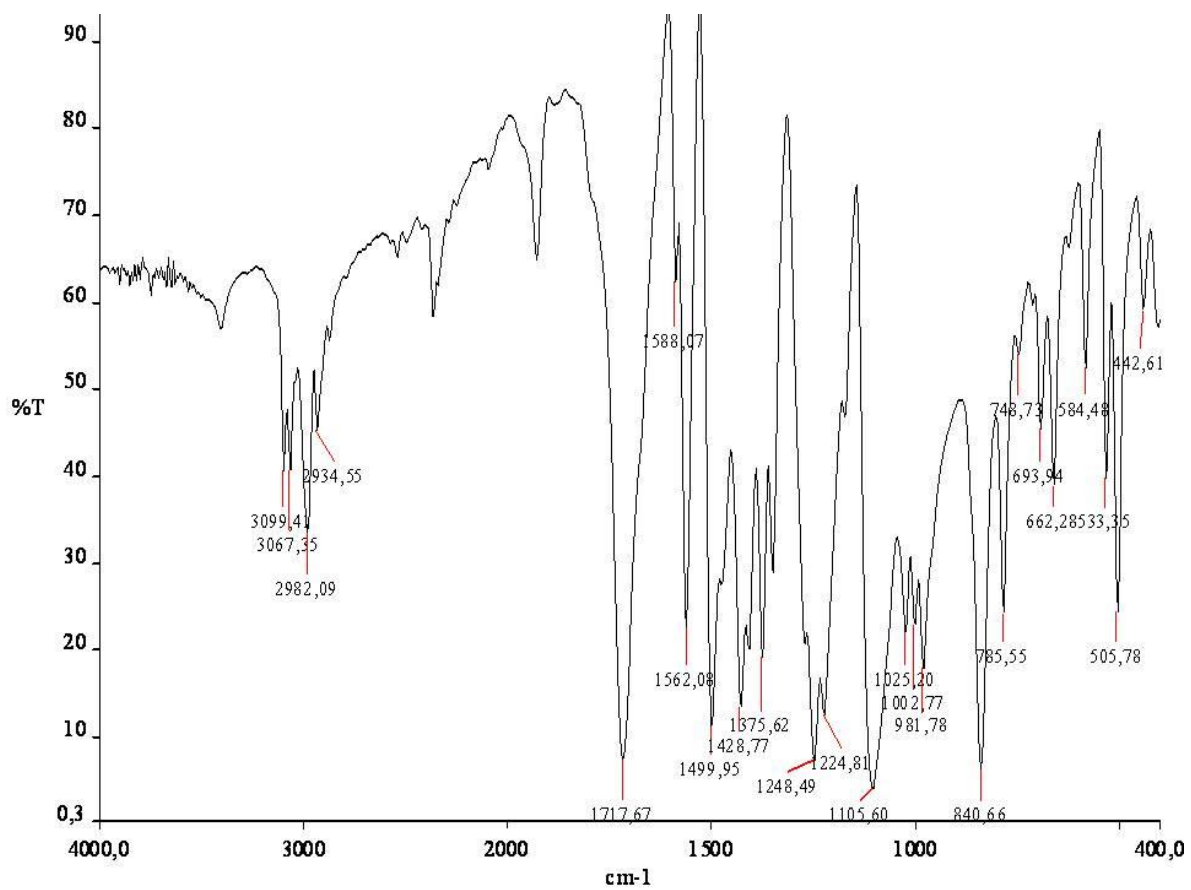

**Figure S21.** FT-IR of triazole **S2b**.

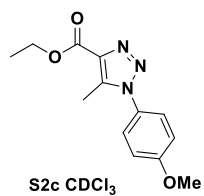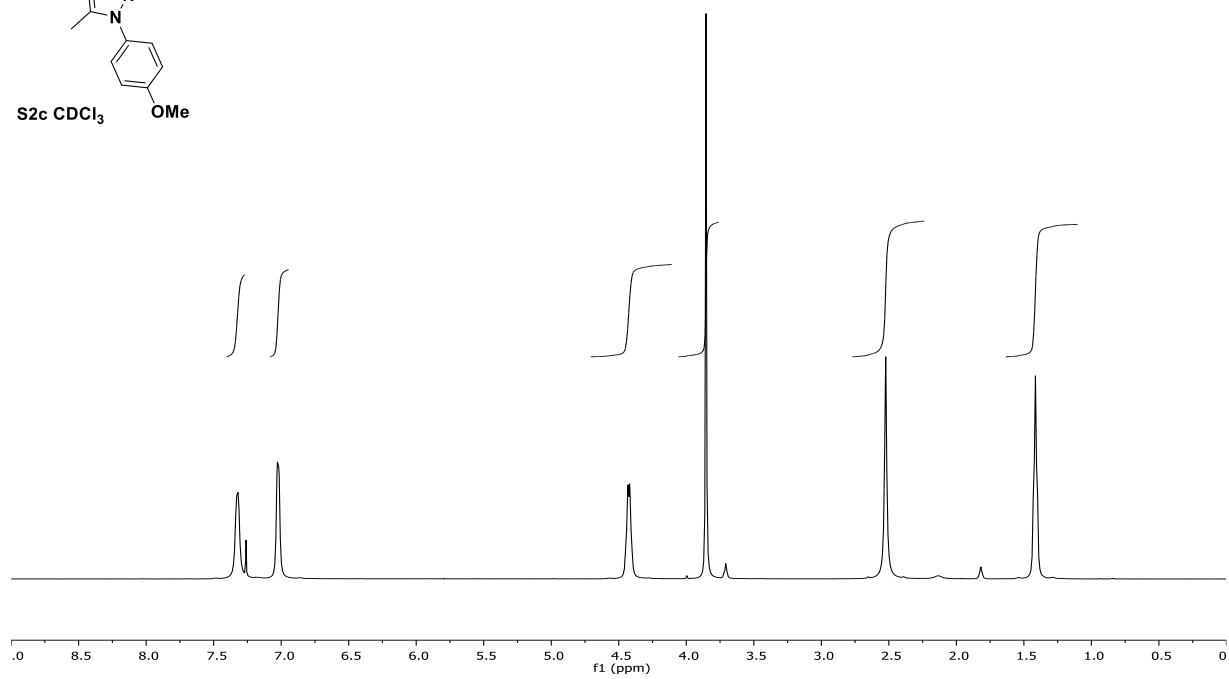

**Figure S22.** <sup>1</sup>H-NMR of triazole **S2c**.

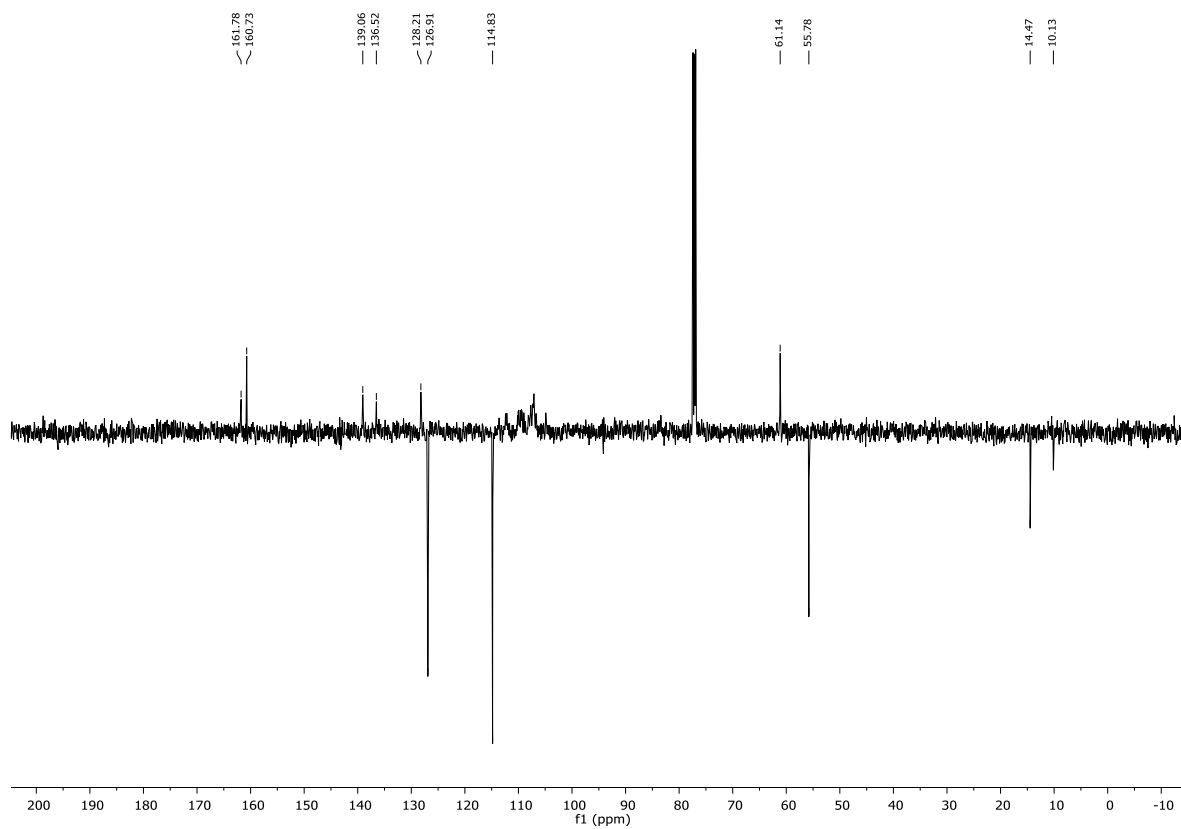

**Figure S23.** <sup>13</sup>C-NMR-APT of triazole **S2c**.

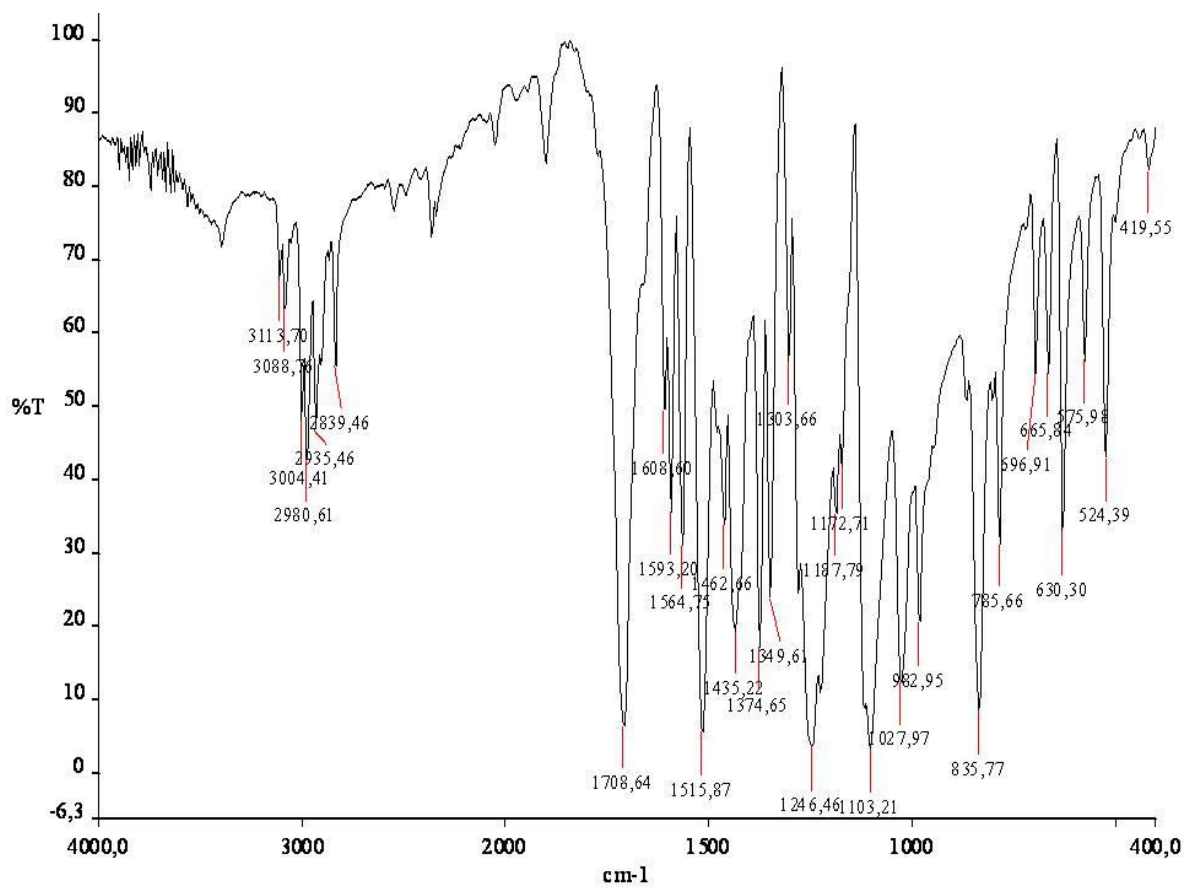

**Figure S24.** FT-IR of triazole S2c.

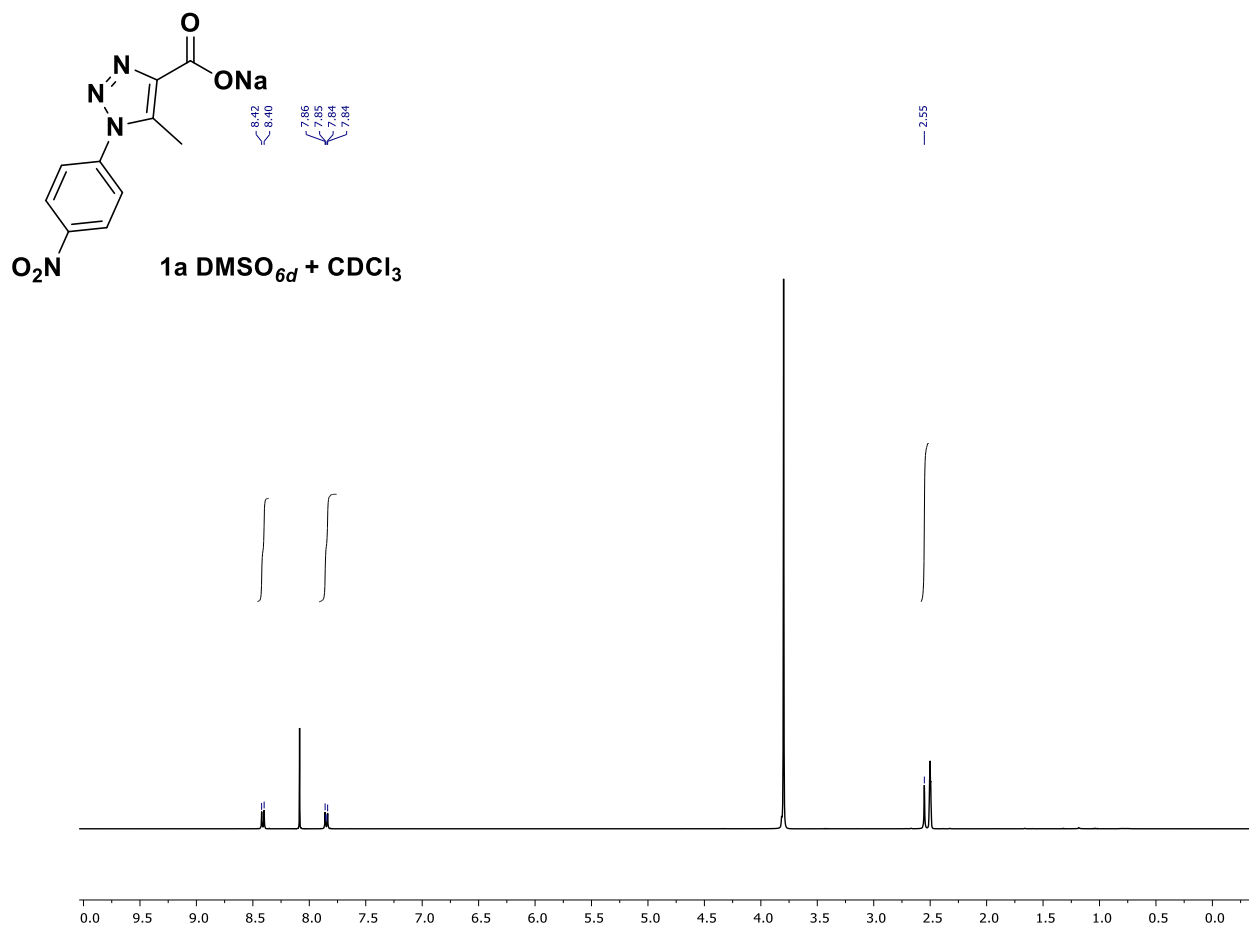

**Figure S25.** <sup>1</sup>H-NMR of triazole **1a**.

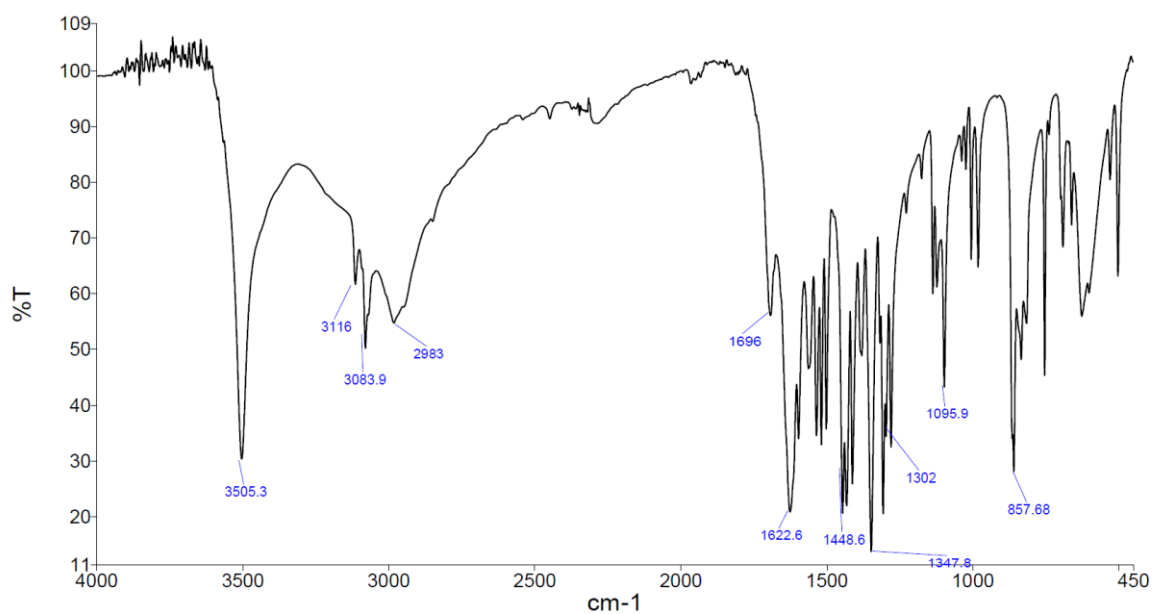

**Figure S26.** FT-IR of triazole **1a**.

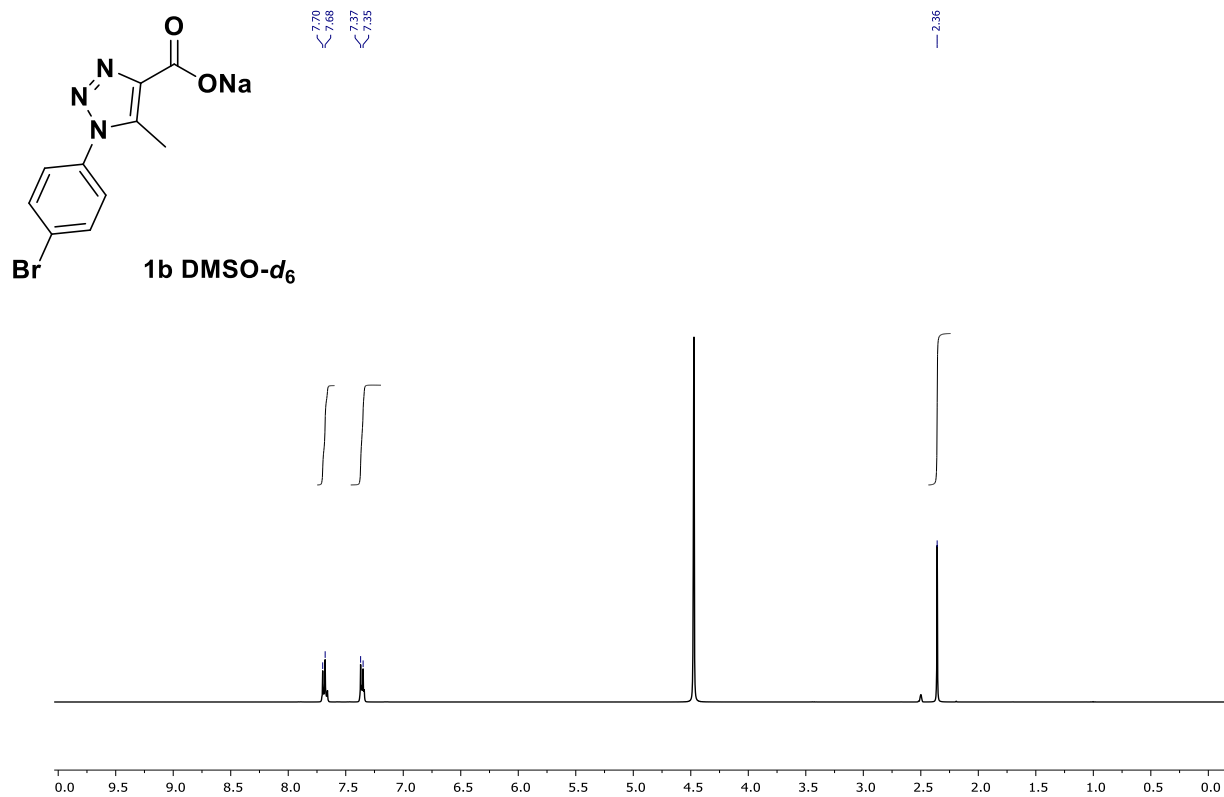

**Figure S27.** <sup>1</sup>H-NMR of triazole **1b**.

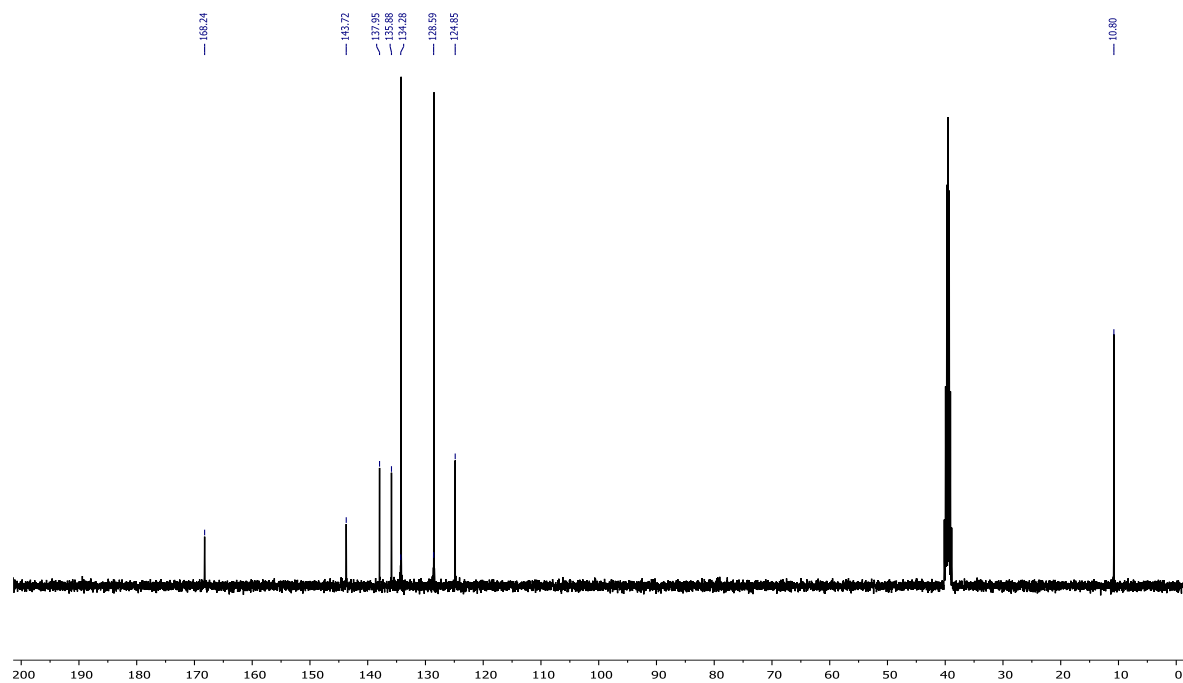

**Figure S28.** <sup>13</sup>C-NMR of triazole **1b**.

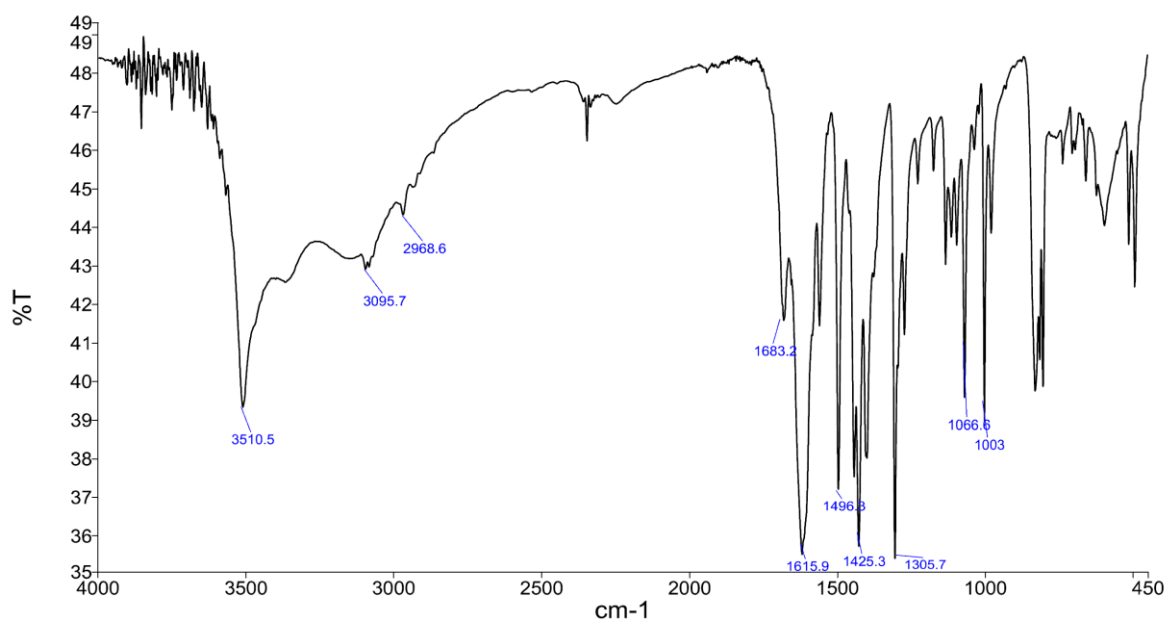

**Figure S29.** FT-IR of triazole **1b**.



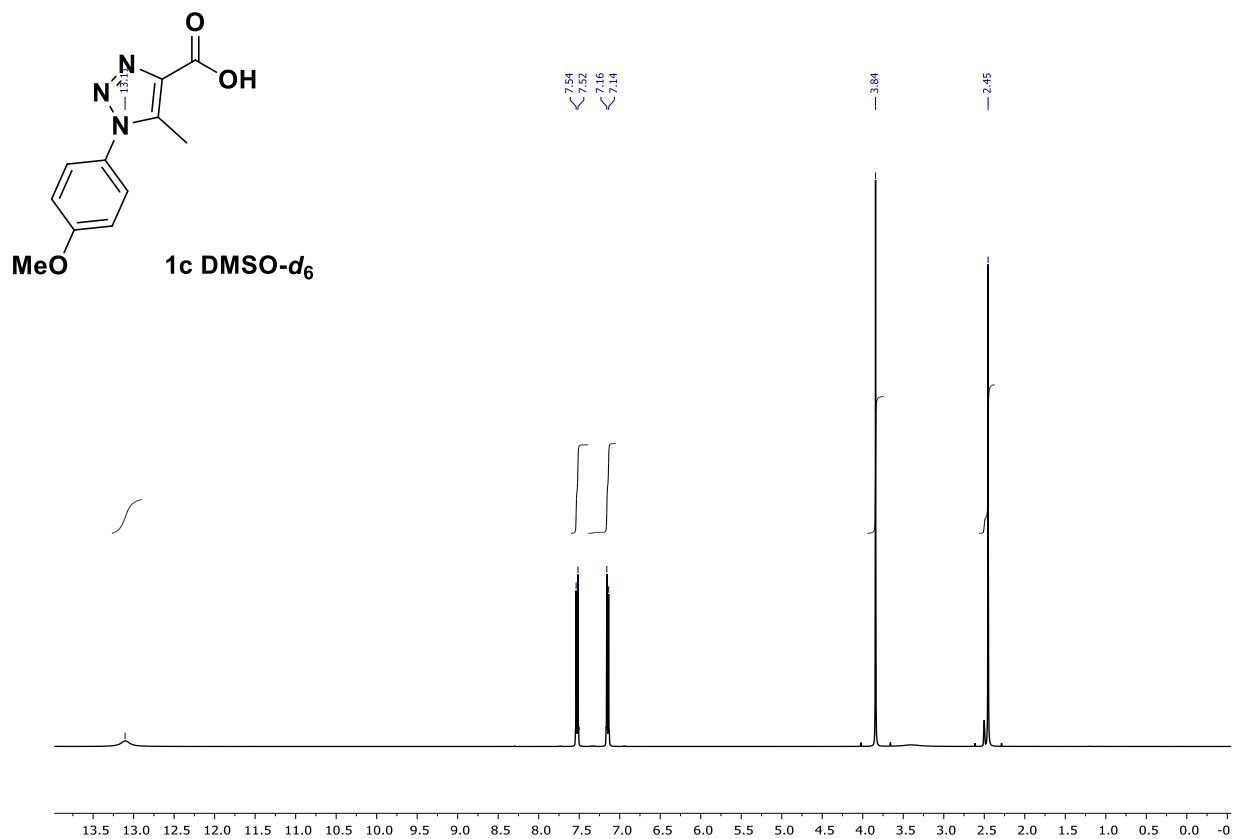

**Figure S30.** <sup>1</sup>H-NMR of triazole **1c**.

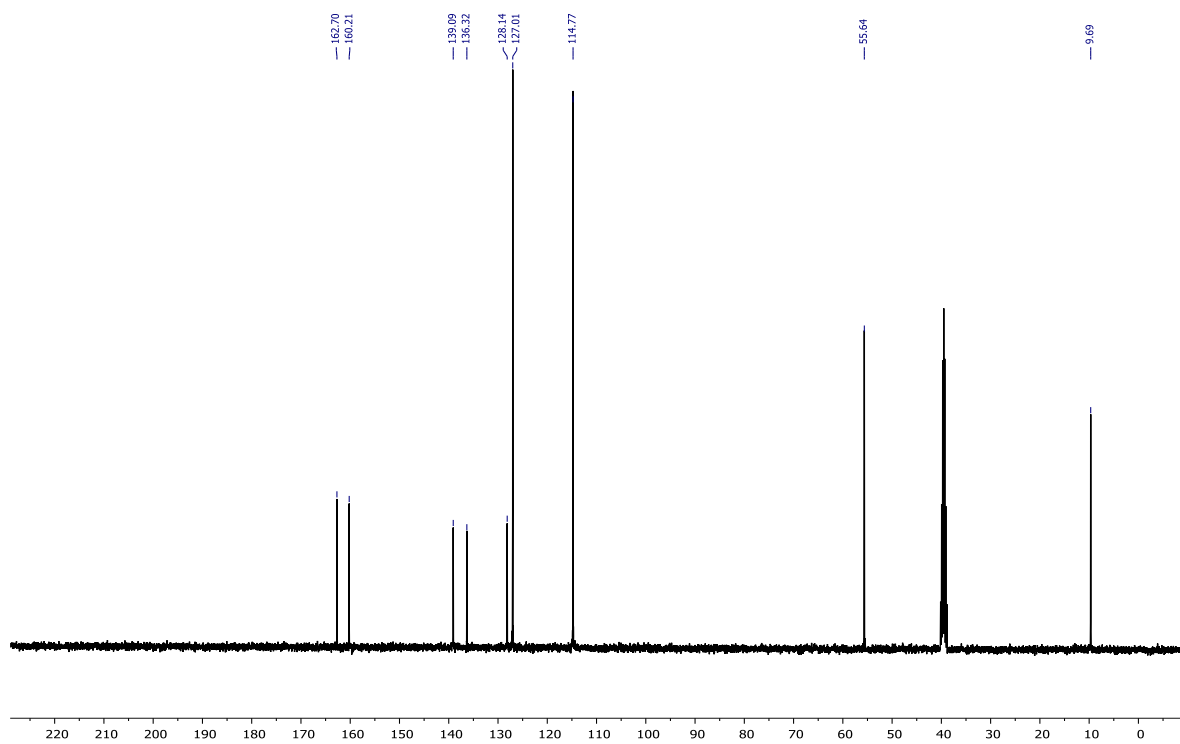

**Figure S31.** <sup>13</sup>C-NMR of triazole **1c**.

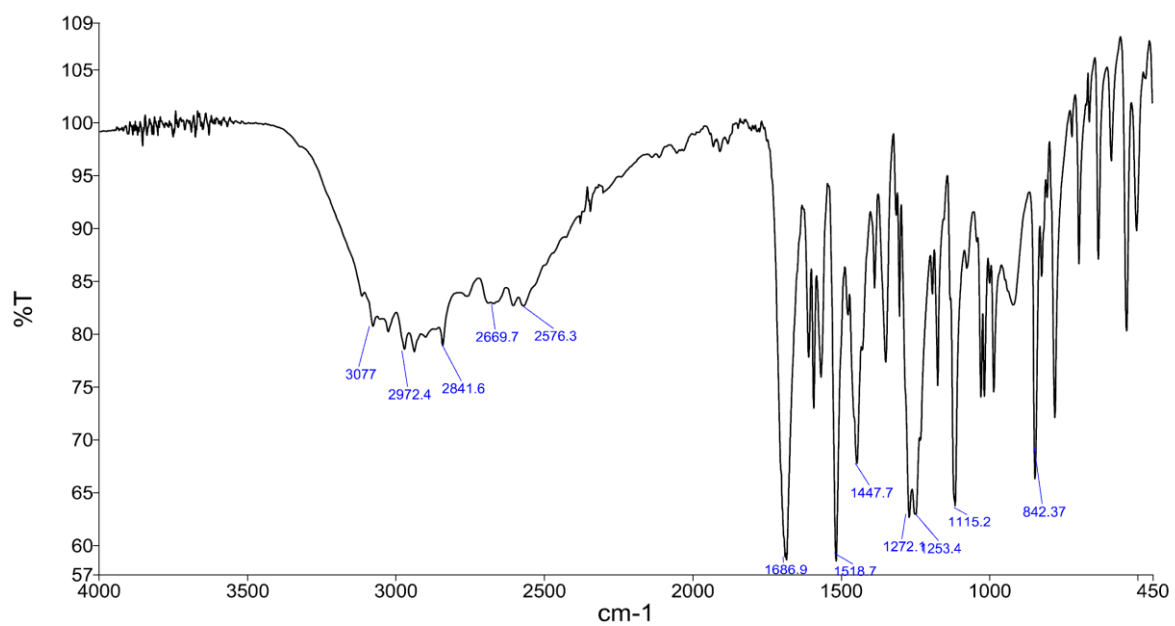

**Figure S32.** FT-IR of triazole **1c**.

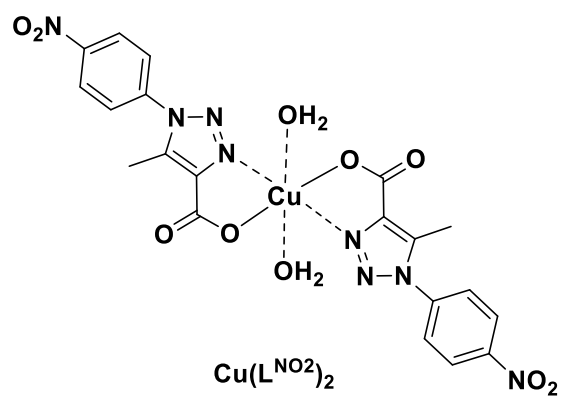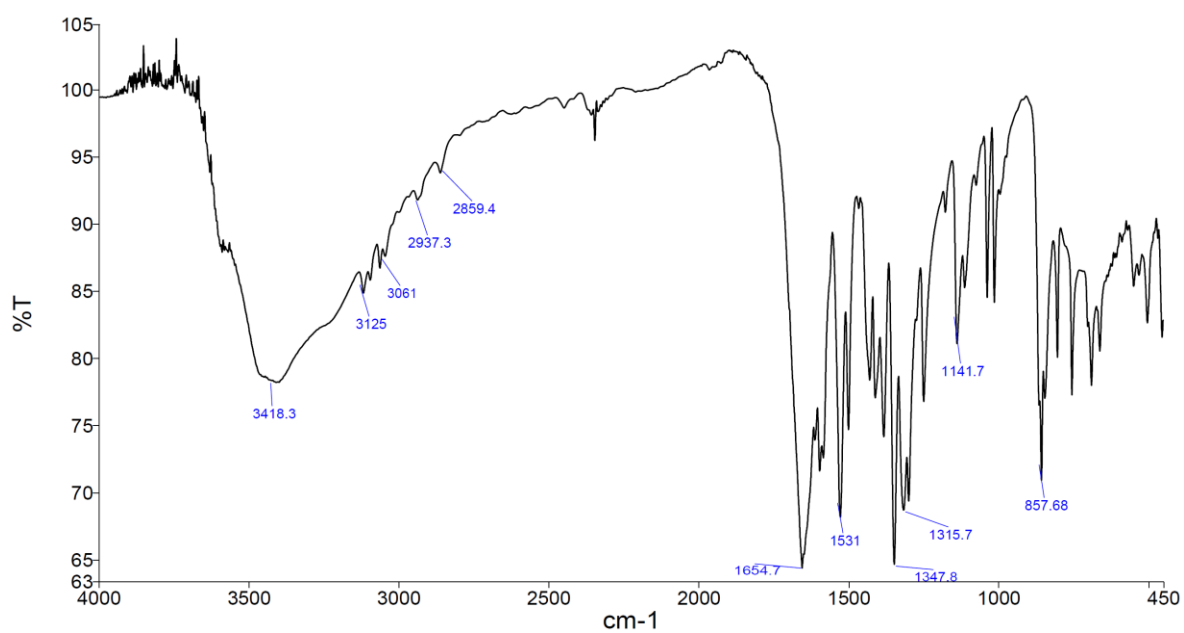

**Figure S33.** FT-IR of triazole  $\text{Cu}(\text{L}^{\text{NO}_2})_2$

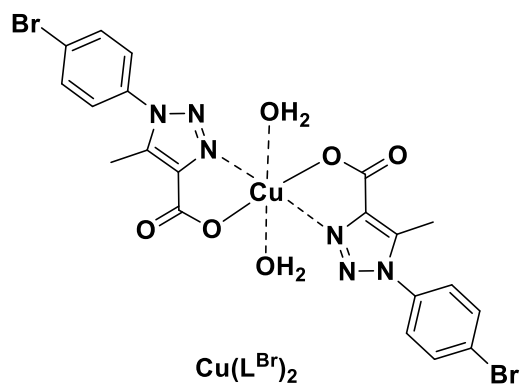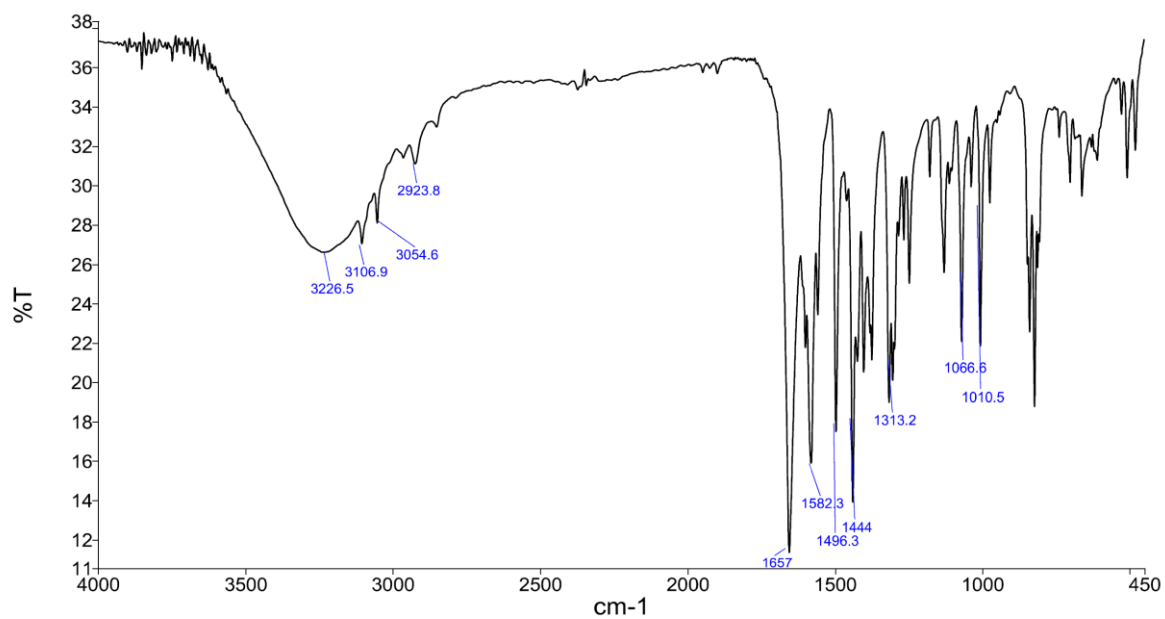

**Figure S34.** FT-IR of triazole  $\text{Cu}(\text{L}^{\text{Br}})_2$

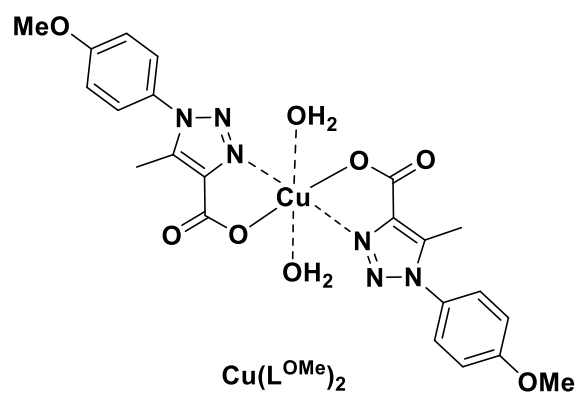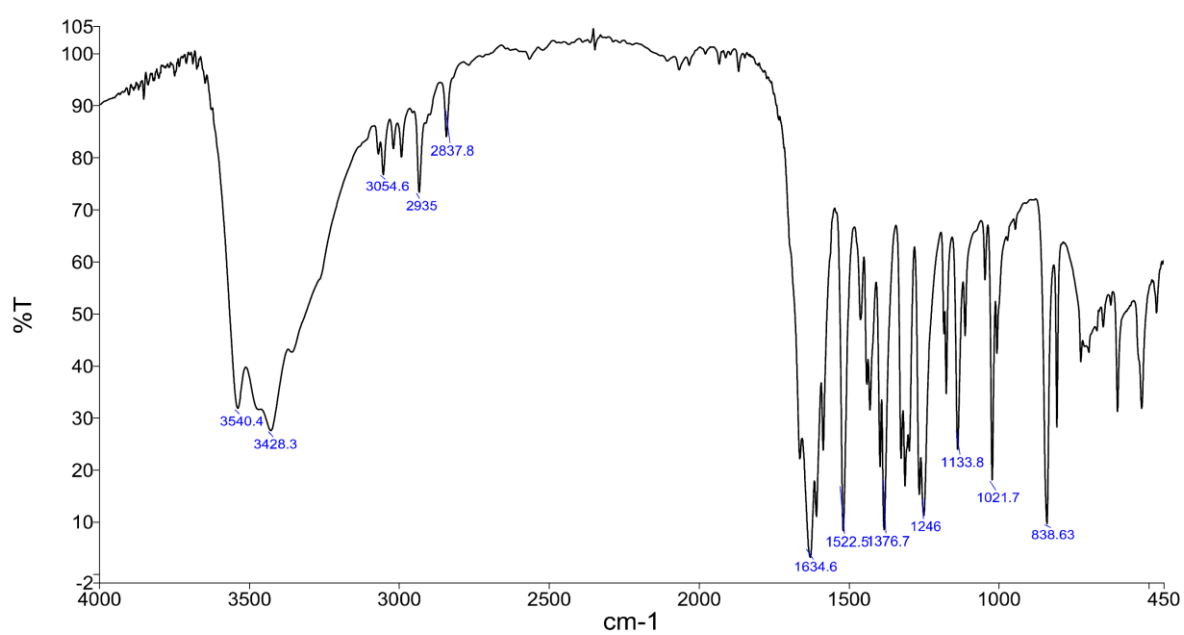

**Figure S35.** FT-IR of triazole  $\text{Cu}(\text{L}^{\text{OMe}})_2$
